# Supplementary material for: Hybrid metagenomic assembly enables high-resolution analysis of resistance determinants and mobile elements in human microbiomes
Source: Springer Nature journal article supplement (doi:10.1038/s41587-019-0191-2), 2019-07-29
Supplement: 41587_2019_191_MOESM1_ESM.pdf [file 41587_2019_191_MOESM1_ESM.pdf]

In the format provided by the authors and unedited.

# Hybrid metagenomic assembly enables high-resolution analysis of resistance determinants and mobile elements in human microbiomes

Denis Bertrand<sup>1</sup>, Jim Shaw<sup>1</sup>, Manesh Kalathiyappan<sup>1</sup>, Amanda Hui Qi Ng<sup>1</sup>, M. Senthil Kumar<sup>1</sup>, Chenhao Li <sup>1</sup>, Mirta Dvornicic<sup>1,2</sup>, Janja Paliska Soldo<sup>1</sup>, Jia Yu Koh<sup>1</sup>, Chengxuan Tong<sup>1</sup>, Oon Tek Ng<sup>3</sup>, Timothy Barkham <sup>4</sup>, Barnaby Young<sup>3,5</sup>, Kalisvar Marimuthu<sup>6,7</sup>, Kern Rei Chng<sup>1</sup>, Mile Sikic <sup>2</sup> and Niranjan Nagarajan <sup>1,7\*</sup>

---

<sup>1</sup>Computational & Systems Biology, Genome Institute of Singapore, Singapore, Singapore. <sup>2</sup>Faculty of Electrical Engineering and Computing, Department of Electronic Systems and Information Processing, University of Zagreb, Zagreb, Croatia. <sup>3</sup>National Centre for Infectious Disease, Tan Tock Seng Hospital, Singapore, Singapore. <sup>4</sup>Department of Laboratory Medicine, Tan Tock Seng Hospital, Singapore, Singapore. <sup>5</sup>Lee Kong Chian School of Medicine, Nanyang Technological University, Singapore, Singapore. <sup>6</sup>Institute of Infectious Diseases and Epidemiology, Tan Tock Seng Hospital, Singapore, Singapore. <sup>7</sup>National University of Singapore, Singapore, Singapore. \*e-mail: [nagarajann@gis.a-star.edu.sg](mailto:nagarajann@gis.a-star.edu.sg)

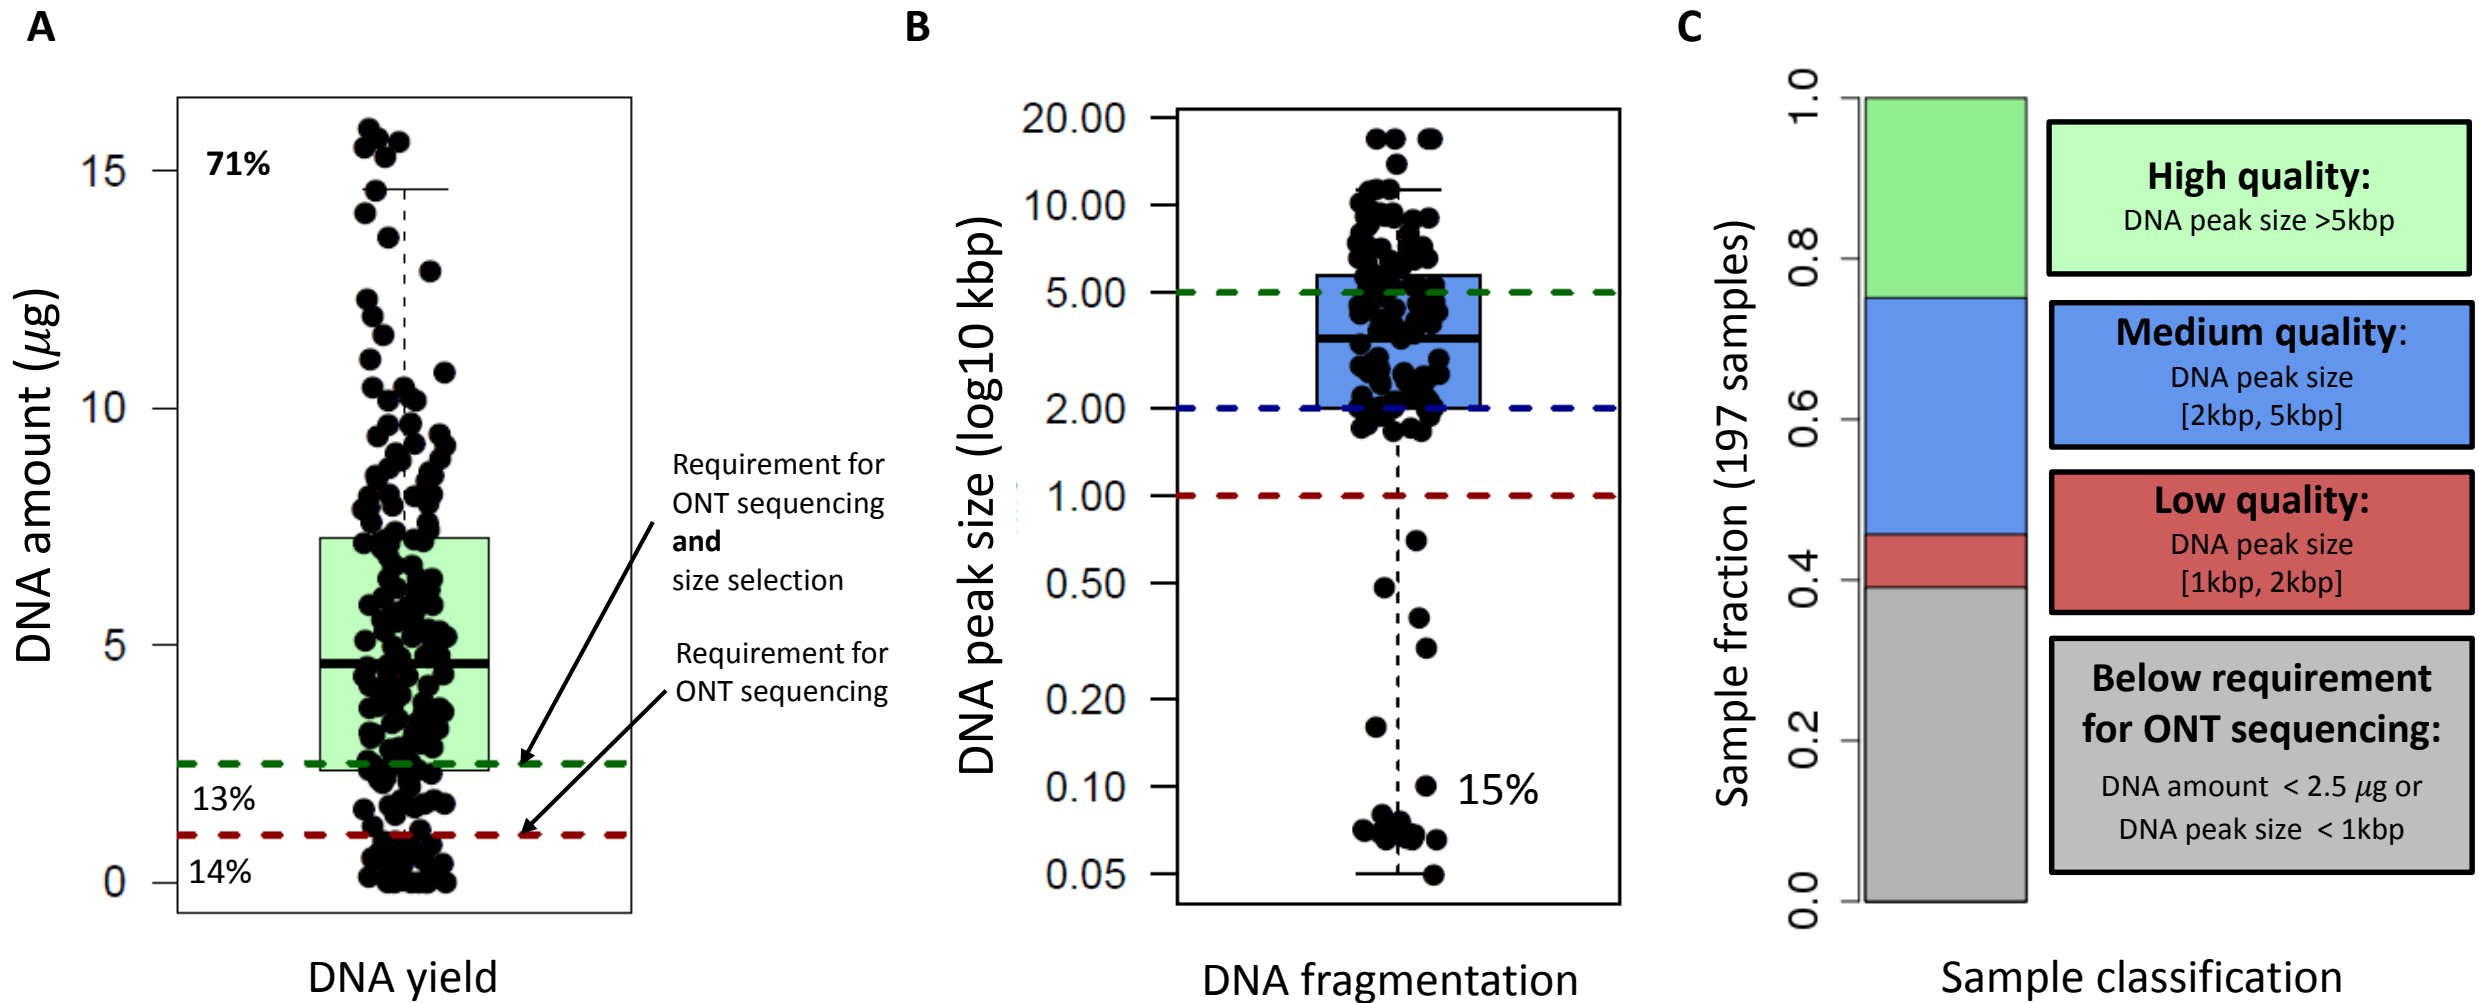

**Supplementary Figure 1:** High quality DNA for ONT sequencing extracted from human stool samples ( $n=197$ ). Distribution of (A) DNA yield and (B) DNA fragmentation across samples. Data in B and C is presented as a boxplot (center line, median; box limits, upper and lower quartiles; whiskers,  $1.5\times$  interquartile range; points, outliers). (C) classification of samples according to DNA quality. In general, we found that  $>60\%$  of samples could be used for ONT sequencing despite working with limited stool quantities.

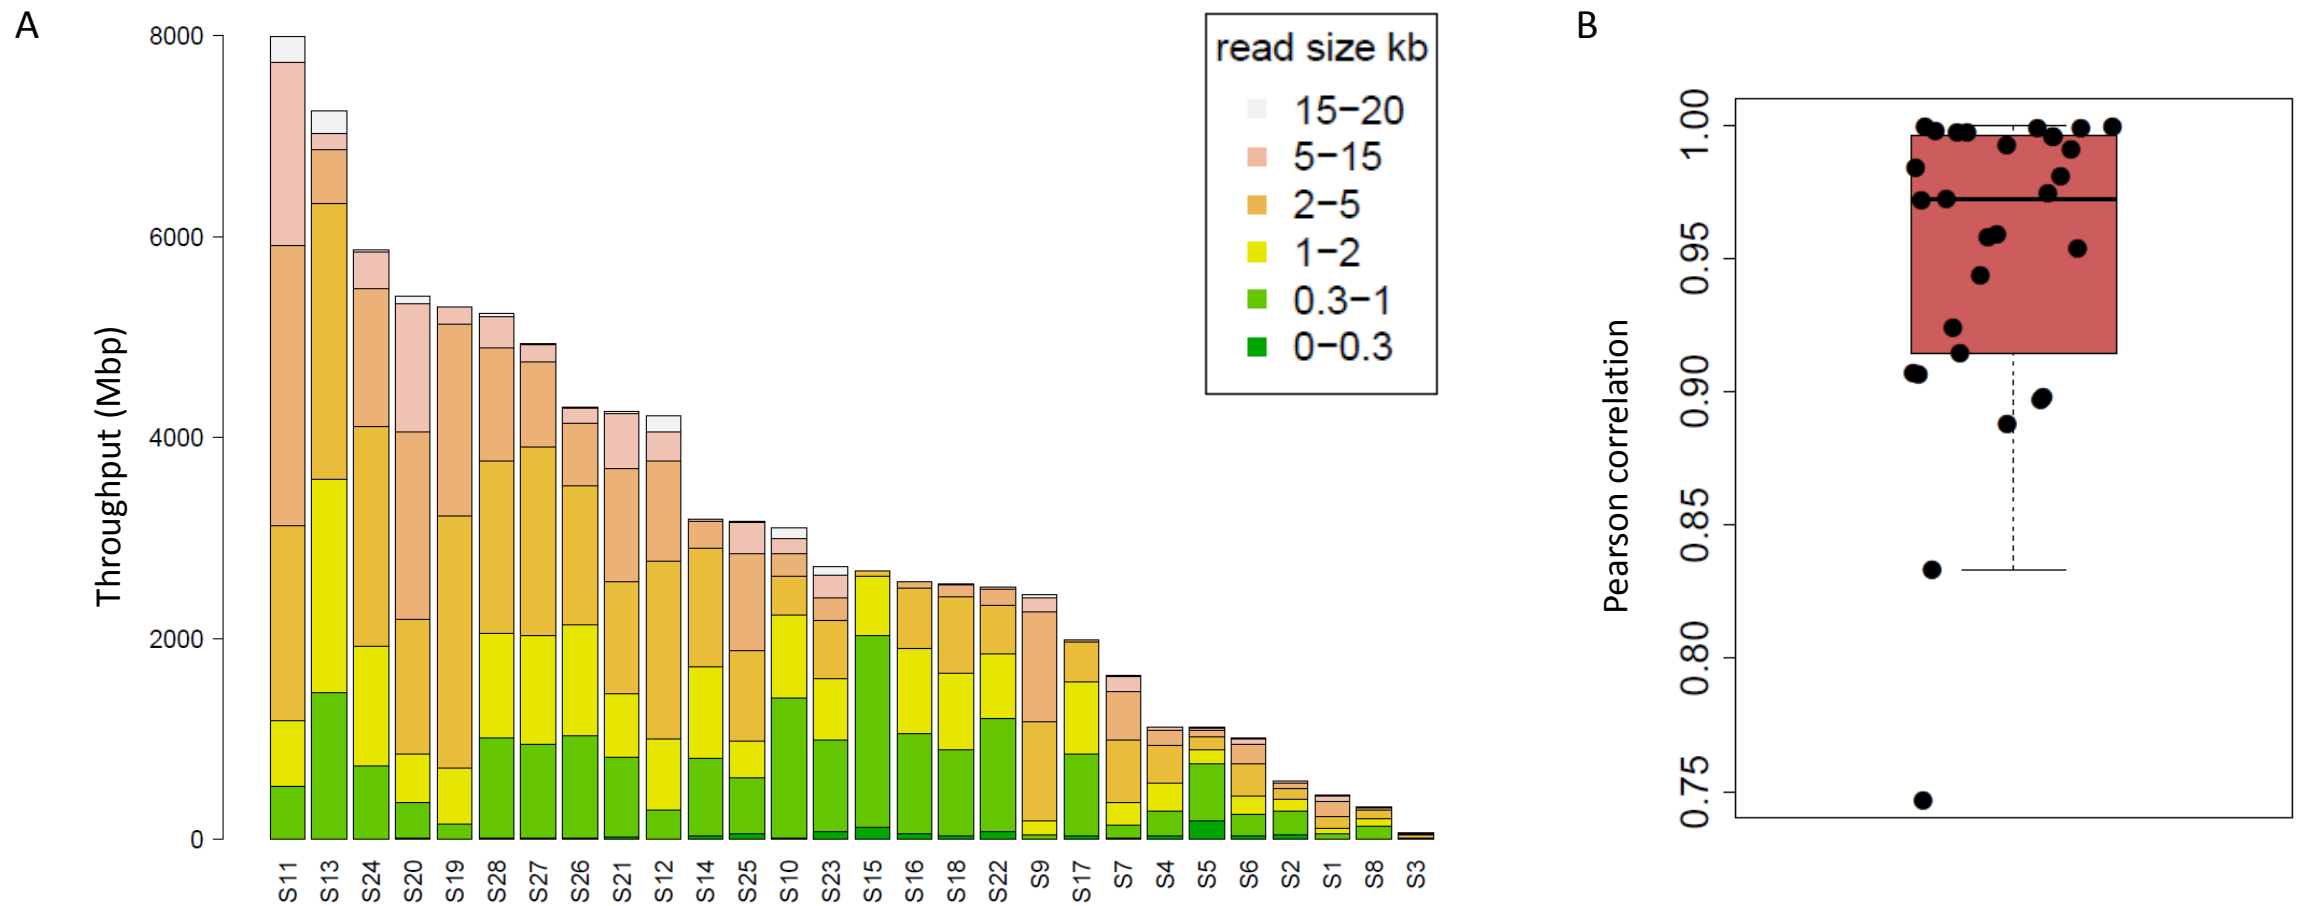

**Supplementary Figure 2:** Characteristics of long reads for stool metagenomics using ONT sequencing. (A) Throughput as a function of read length across different samples. Reads longer than 1kbp typically provide >80% of the data and in some libraries a sizeable fraction of reads were longer than 5kbp. (B) Correlation between species-level relative abundances using Illumina and ONT data (n=28 samples). The high concordance seen suggests that ONT sequencing does not introduce a significant bias towards some species compared to Illumina sequencing. Abundance profiles for both short and long reads were obtained using Kraken (v0.10.5-beta, default parameters; species with abundance <0.1% were ignored to avoid the introduction of false positives into the correlation analysis). Data is presented as boxplots (center line, median; box limits, upper and lower quartiles; whiskers, 1.5× interquartile range; points, outliers).

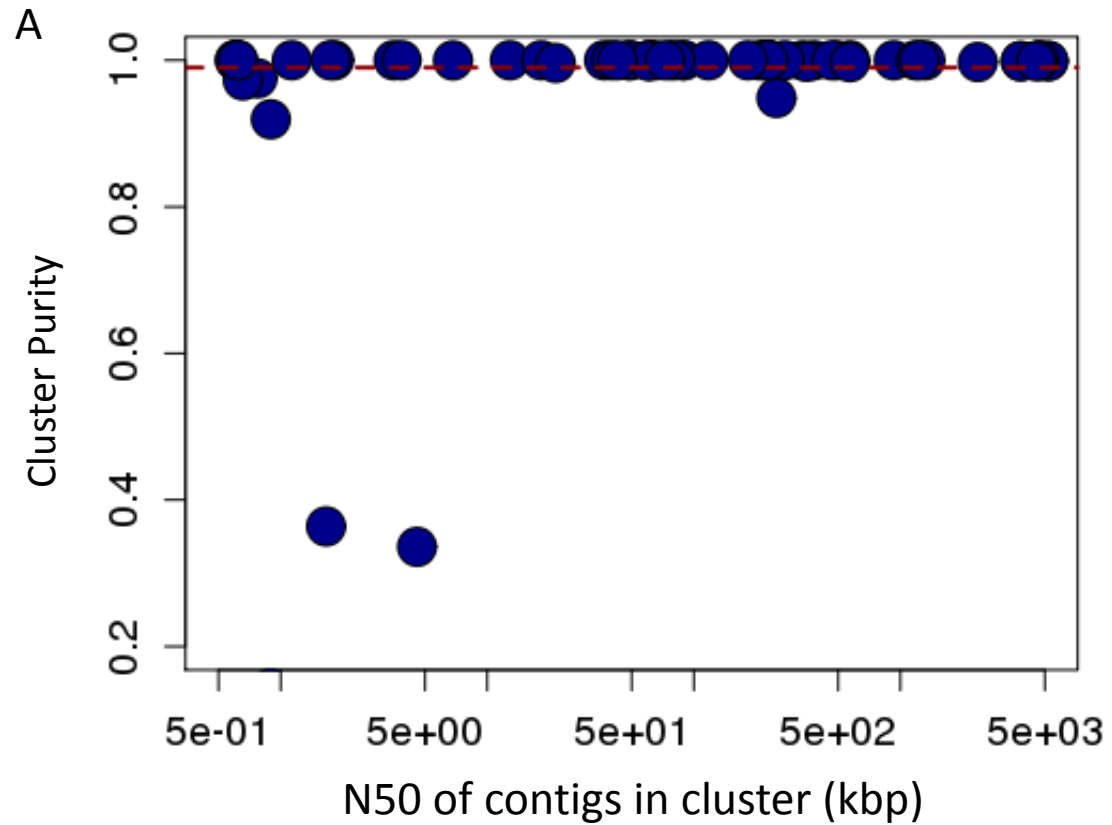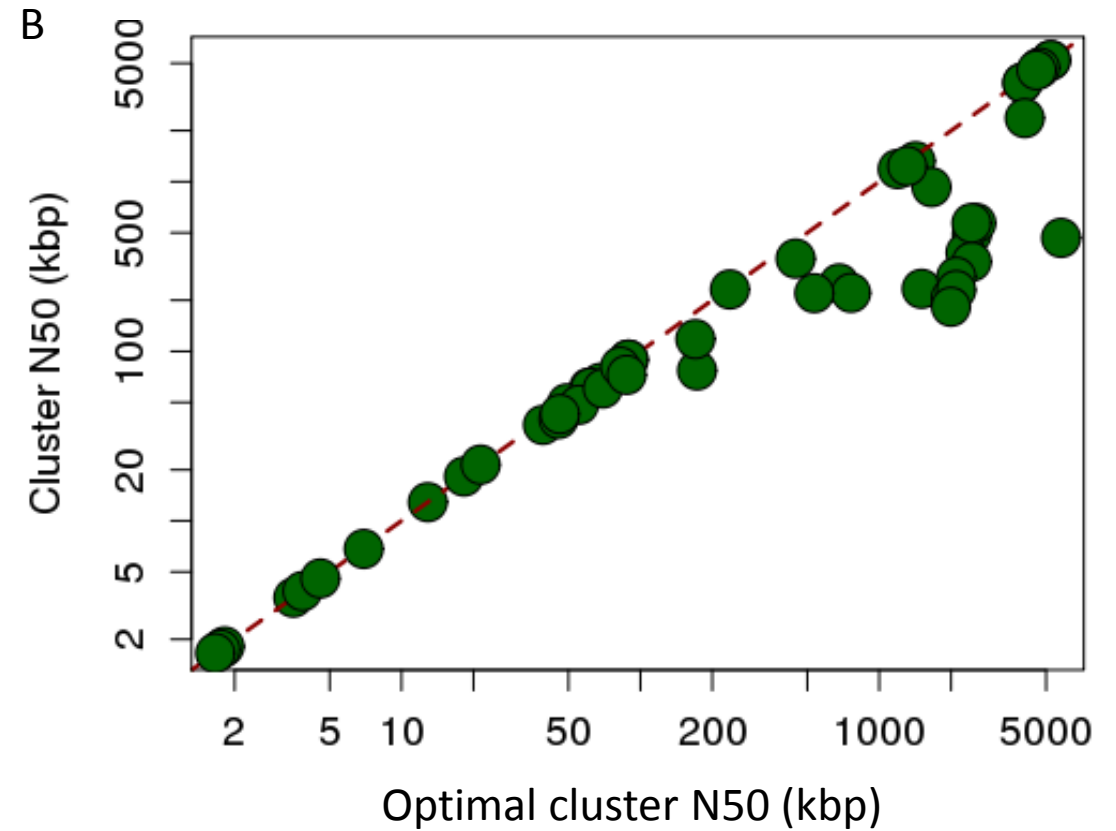

**Supplementary Figure 3:** Evaluation of OPERA-MS clusters. (A) Purity of clusters (fraction of sequence in cluster that comes from the dominant genome) versus size of contigs in cluster (N50 = size such that >50% of the sequence in the cluster is in longer contigs). Note that for most genomes cluster purity is >99% (dotted red line), except in the case of two genomes from the HMP Mock community with relative abundances <0.01%. (B) Cluster N50 compared to an optimal cluster N50 (when all connected contigs belonging to a genome are in one cluster). Despite providing conservative clusters, OPERA-MS clusters have N50 that is close to optimal values for most genomes.

GIS20

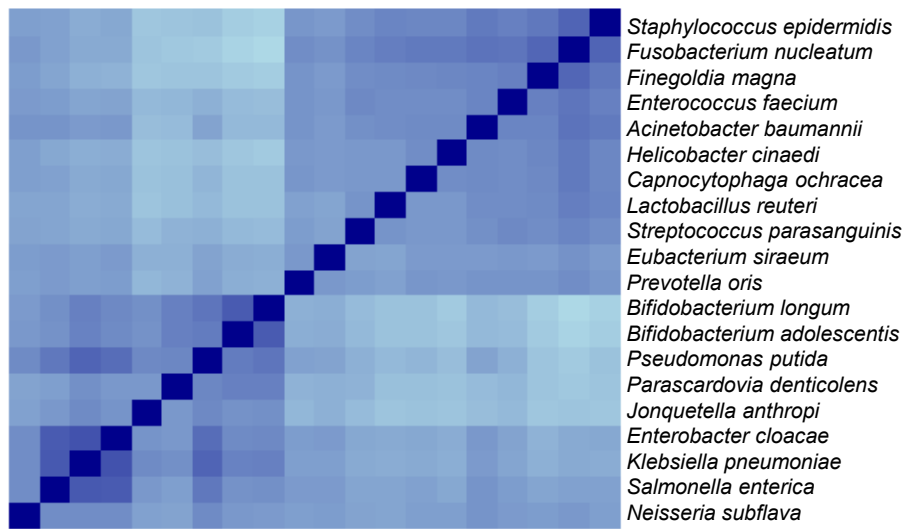

Illumina

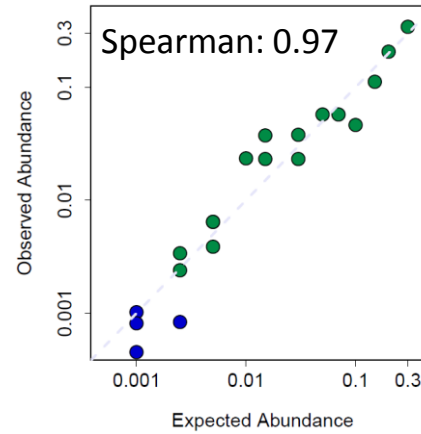

ONT

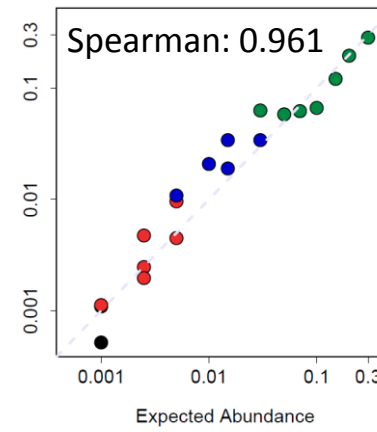

Pacbio

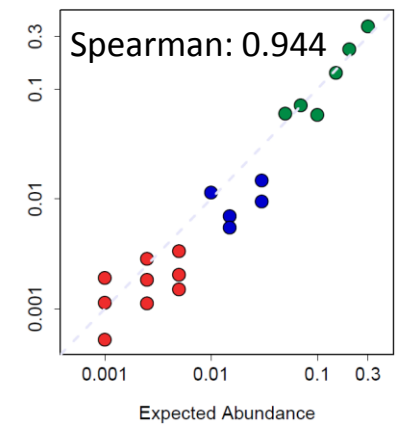Mash genomic distance

0 0.2 0.4

Species Coverage

- >30x
- 5 to 30x
- 1 to 5x
- <1x

HMP mock  
staggered

Mash genomic distance

0 0.2 0.4

- Escherichia coli*
- Neisseria meningitidis*
- Acinetobacter baumannii*
- Helicobacter pylori*
- Bacteroides vulgatus*
- Rhodobacter sphaeroides*
- Pseudomonas aeruginosa*
- Deinococcus radiodurans*
- Propionibacterium acnes*
- Actinomyces odontolyticus*
- Listeria monocytogenes*
- Enterococcus faecalis*
- Staphylococcus epidermidis*
- Staphylococcus aureus*
- Bacillus cereus*
- Streptococcus pneumoniae*
- Streptococcus agalactiae*
- Streptococcus mutans*
- Lactobacillus gasserii*
- Clostridium beijerinckii*

Illumina

Spearman: 0.967

Observed Abundance

Expected Abundance

Illumina Synthetic

Spearman: 0.894

Observed Abundance

Expected Abundance

Pacbio

Spearman: 0.967

Observed Abundance

Expected Abundance

**Supplementary Figure 4:** Characteristics of the mock communities and datasets used in this study. Heatmaps on the left show genomic distances between the species ( $n=20$  for both datasets) that make up the community. Plots on the right show correlation between observed and expected species abundances using various sequencing technologies. Read coverage of the respective genomes were obtained by mapping short reads (BWA-MEM v0.7.10-r789, default parameters) and long reads (GraphMap v0.2.2, default parameters) to the reference genomes.

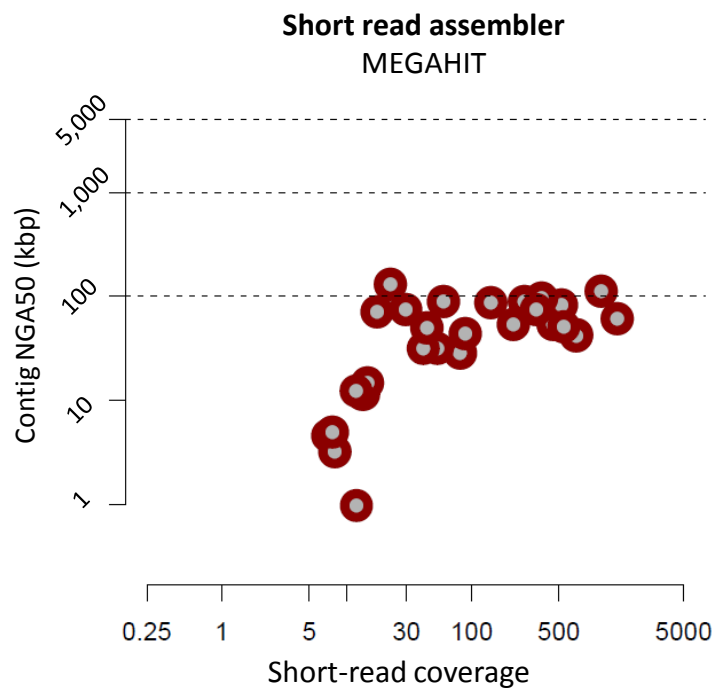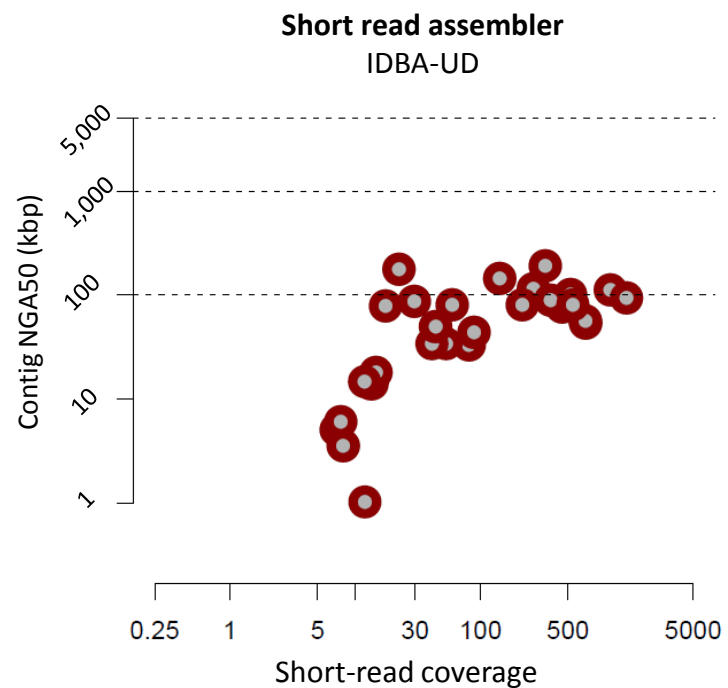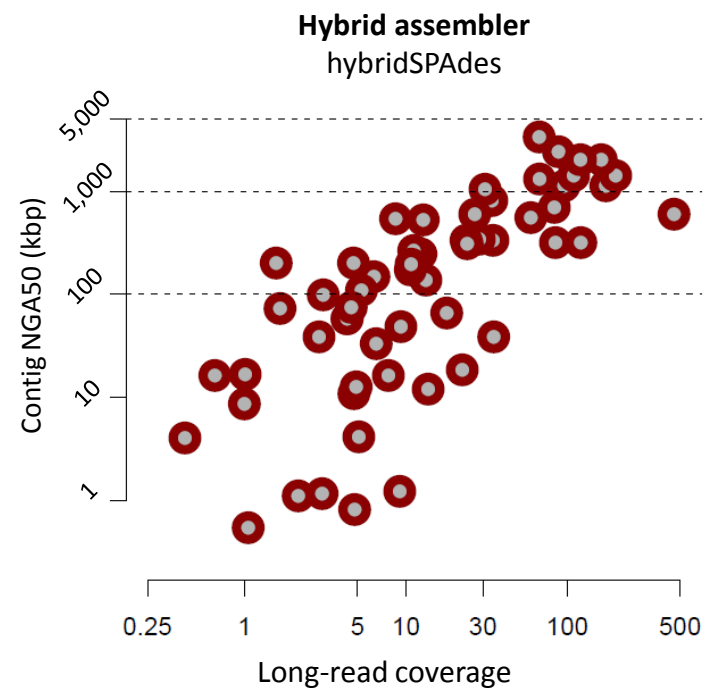

**Supplementary Figure 5:** Correlation between read coverage and contig NGA50 for the genomes assembled by MEGAHIT (n=37), IDBA-UD (n=37) and hybridSPAdes (n=74).

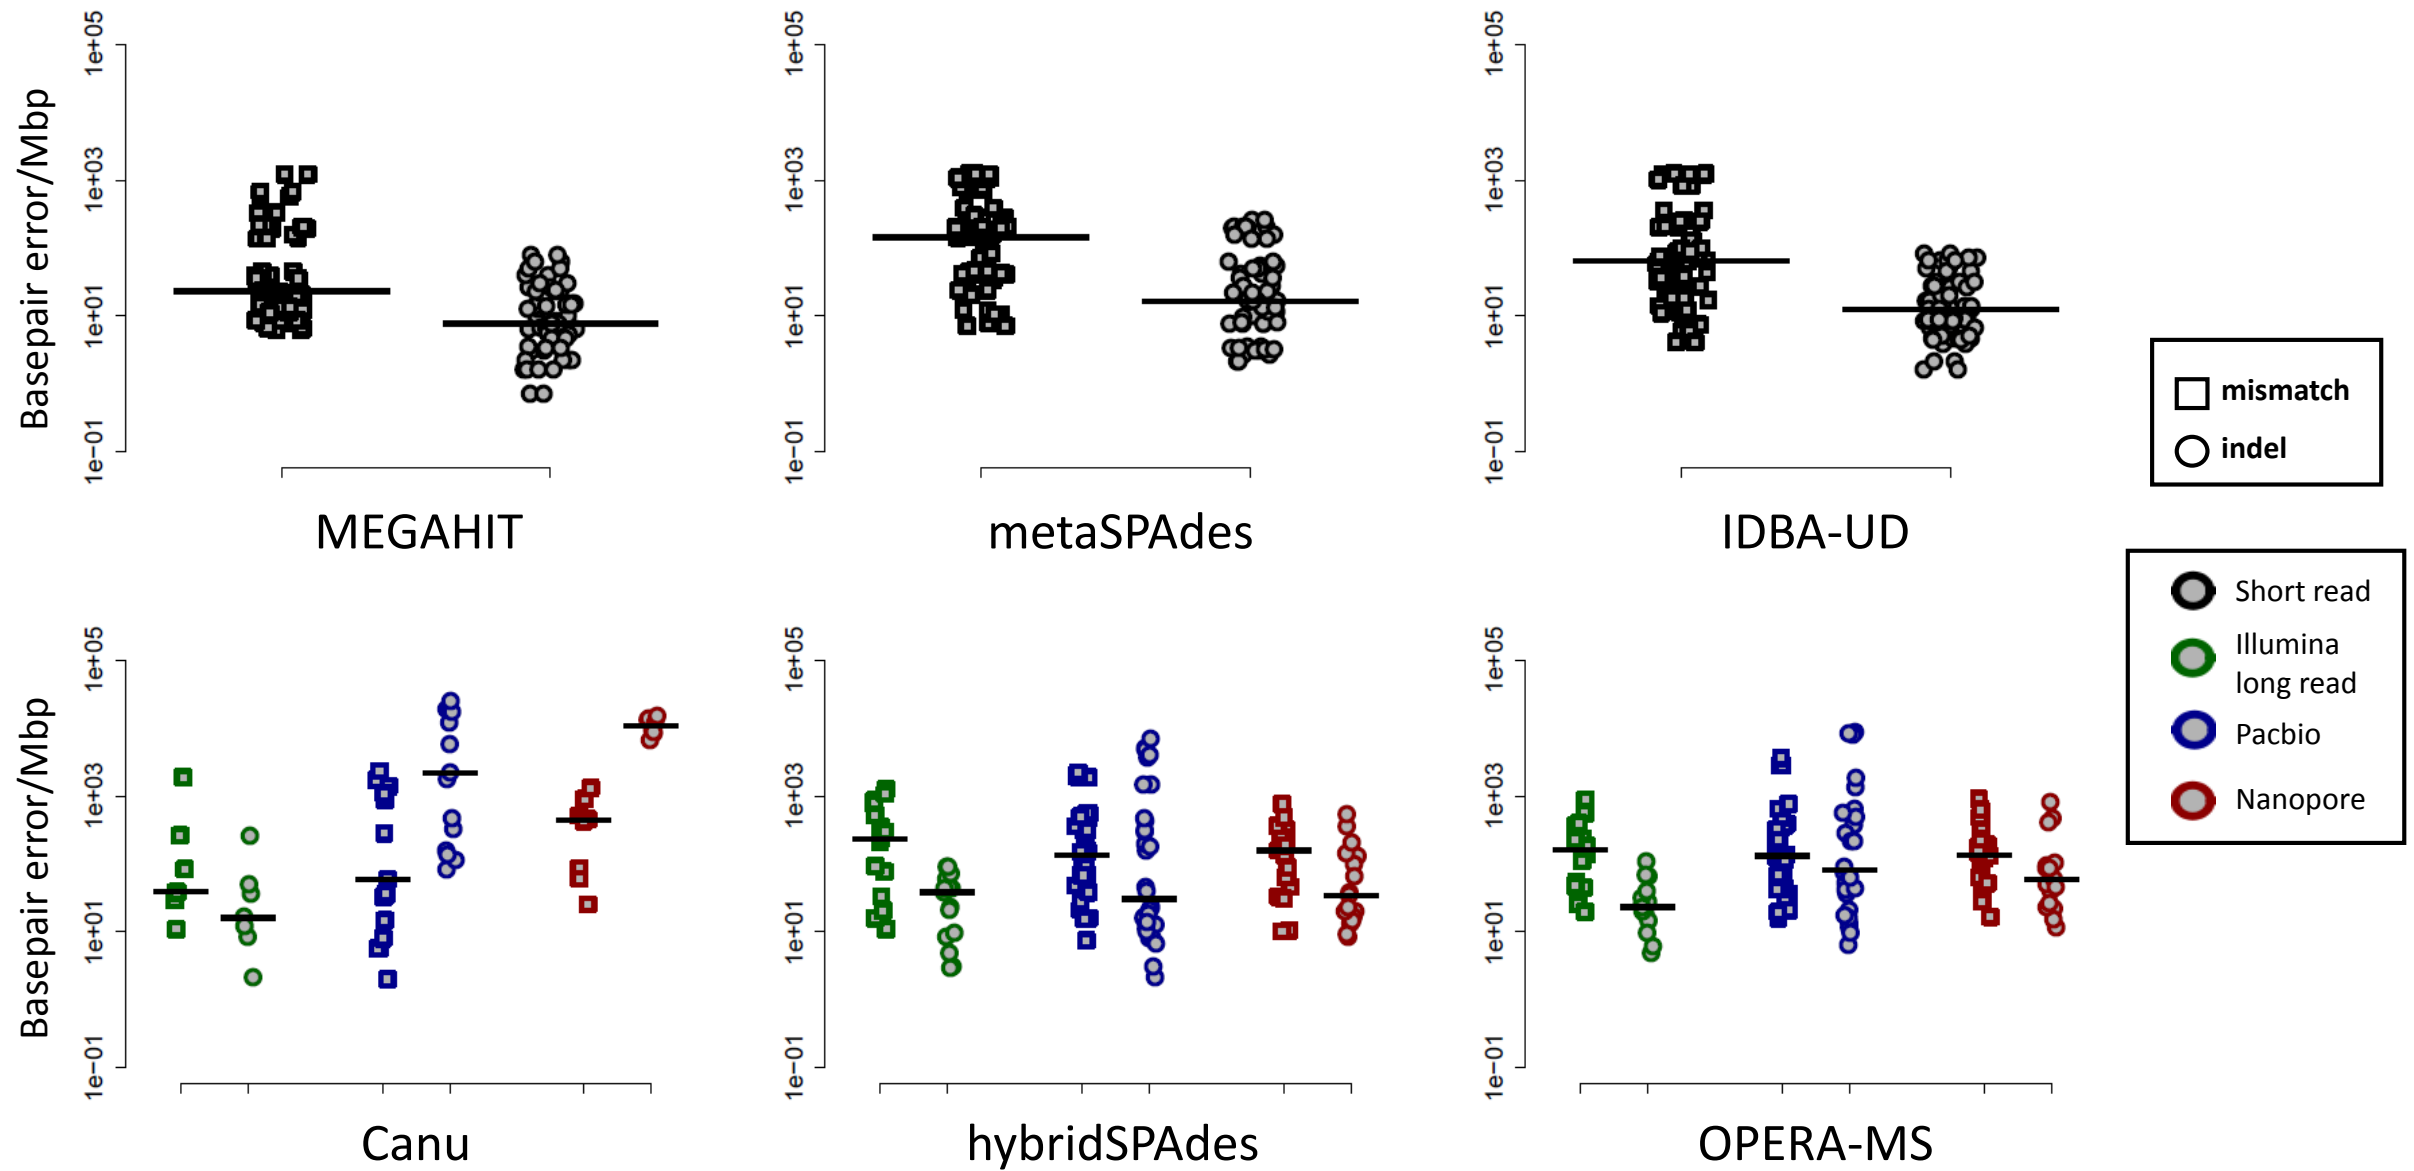

**Supplementary Figure 6:** Indel and mismatch error rates for assemblers as a function of the different sequencing technologies used. Note that each point represents performance for a genome in the mock community datasets used, and that the centre value represents the median.

**OPERA-MS w/  
contigs from  
metaSPAdes**

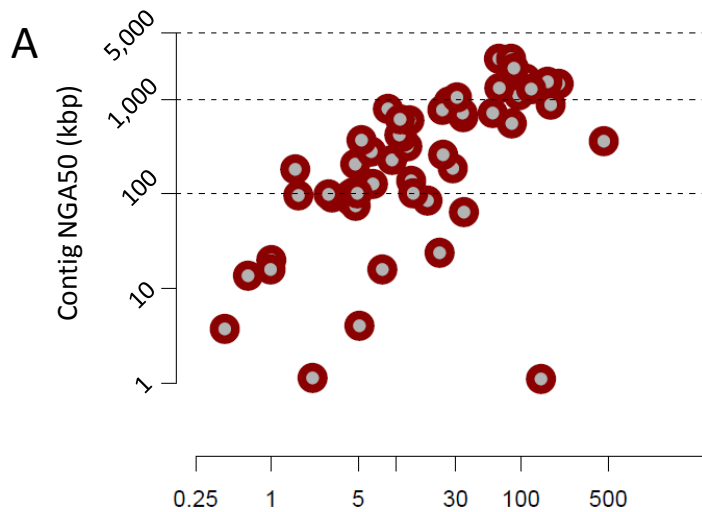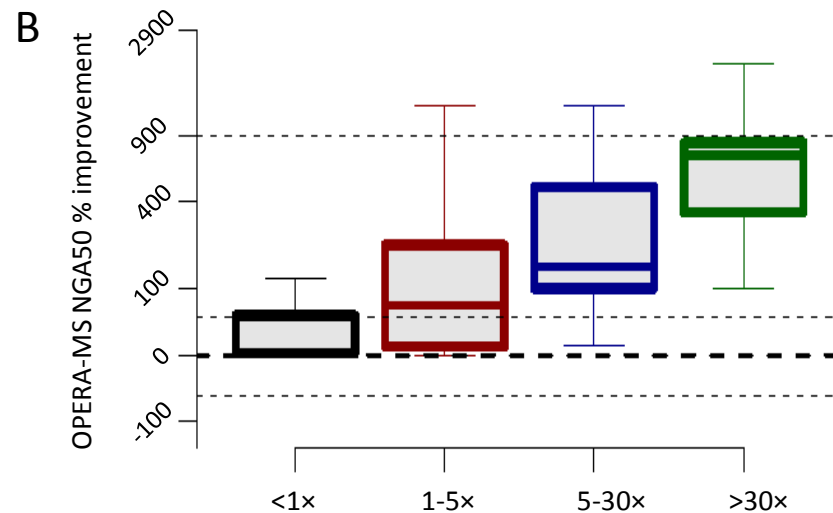

**OPERA-MS w/  
contigs from  
IDBA-UD**

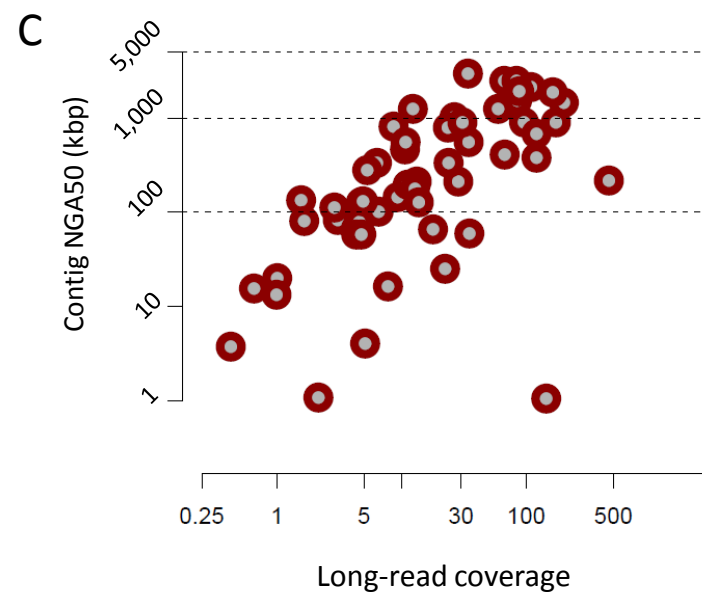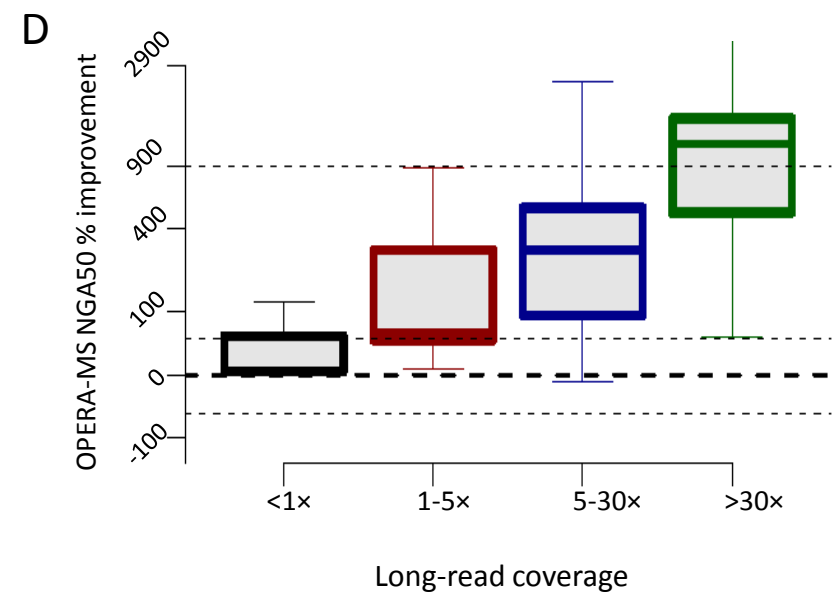

**Supplementary Figure 7:** OPERA-MS assemblies using contigs from other short-read metagenomic assemblers as inputs. (A,C) Scaling of OPERA-MS NGA50 values as a function of long-read coverage (n=74 genomes). (B,D) Improvement in NGA50 values obtained using OPERA-MS when compared to the starting assemblies from metaSPAdes and IDBA-UD, respectively. Data is presented as boxplots (center line, median; box limits, upper and lower quartiles; whiskers, 1.5× interquartile range; points, outliers). The number of genomes in each boxplot, in ascending order of coverage, is 3, 12, 20 and 19.



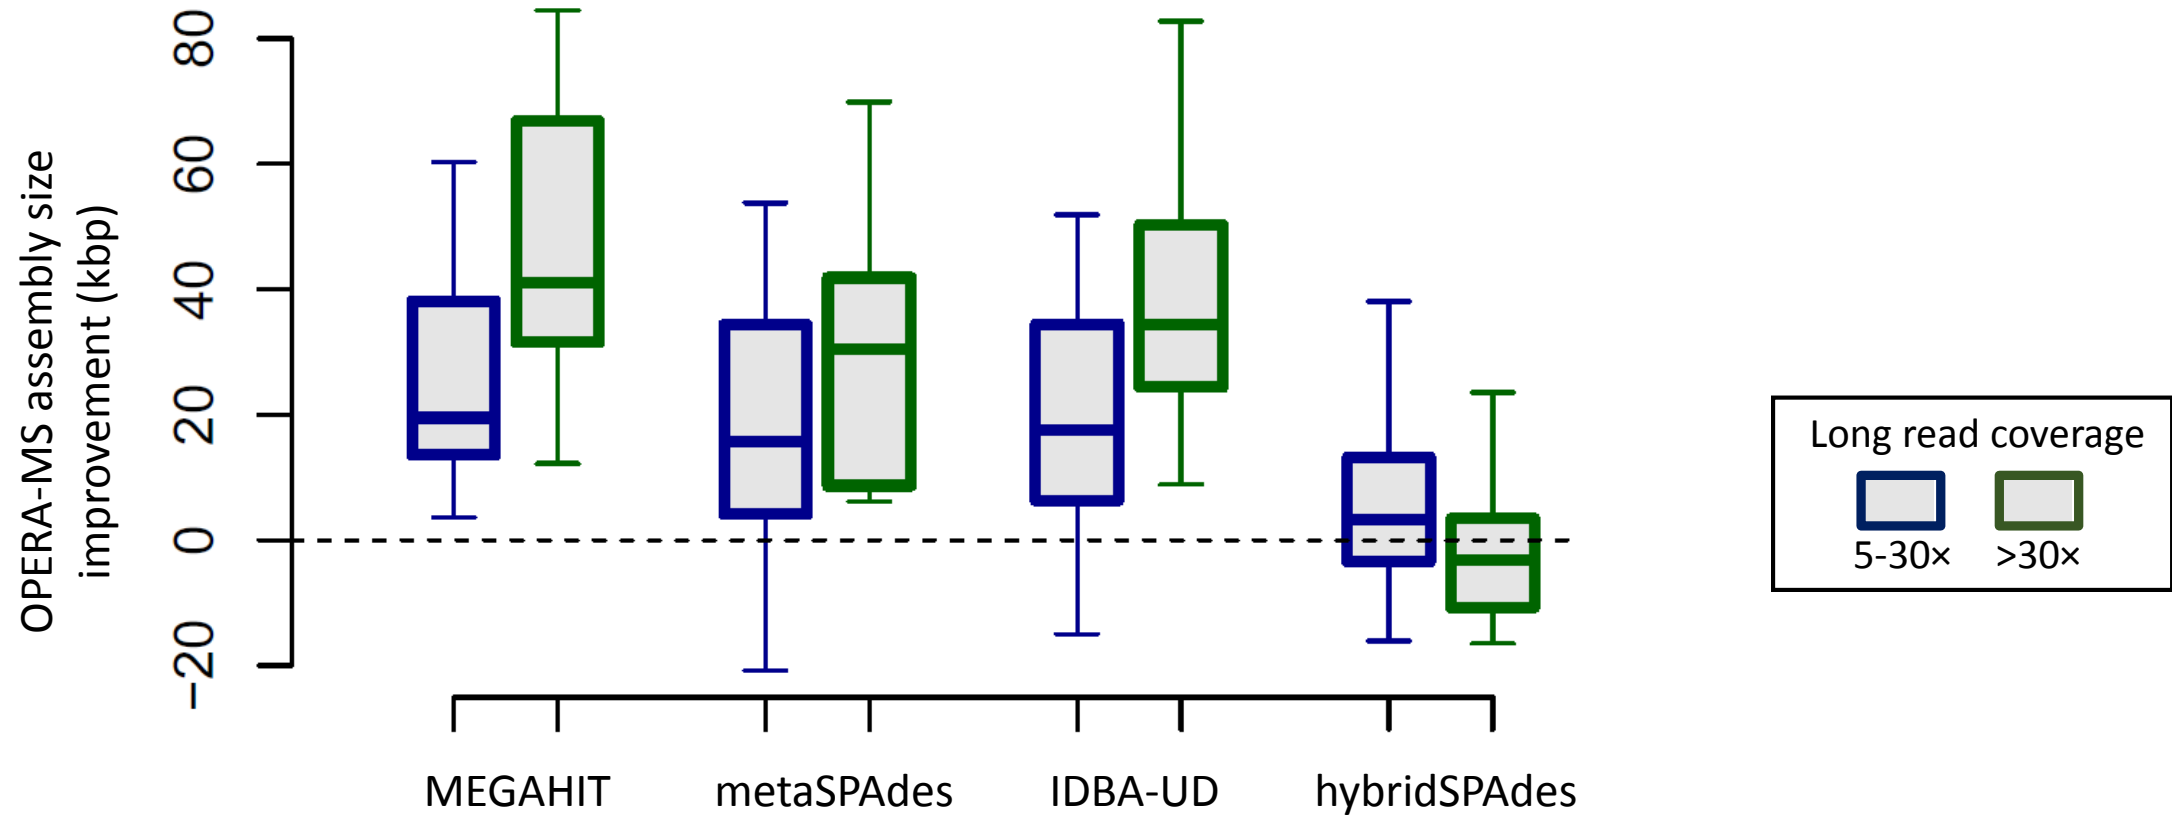

**Supplementary Figure 8:** Evaluation of assembly completeness. OPERA-MS provides more complete assemblies than short read only methods for long read coverage  $>5\times$ . Similar advantages are seen using hybridSPAdes but with a higher misassembly rate (**Figure 2E**). Data is presented as boxplots (center line, median; box limits, upper and lower quartiles; whiskers,  $1.5\times$  interquartile range; points, outliers). The number of genomes for coverages  $5-30\times$  and  $>30\times$  is 21 and 19 respectively.

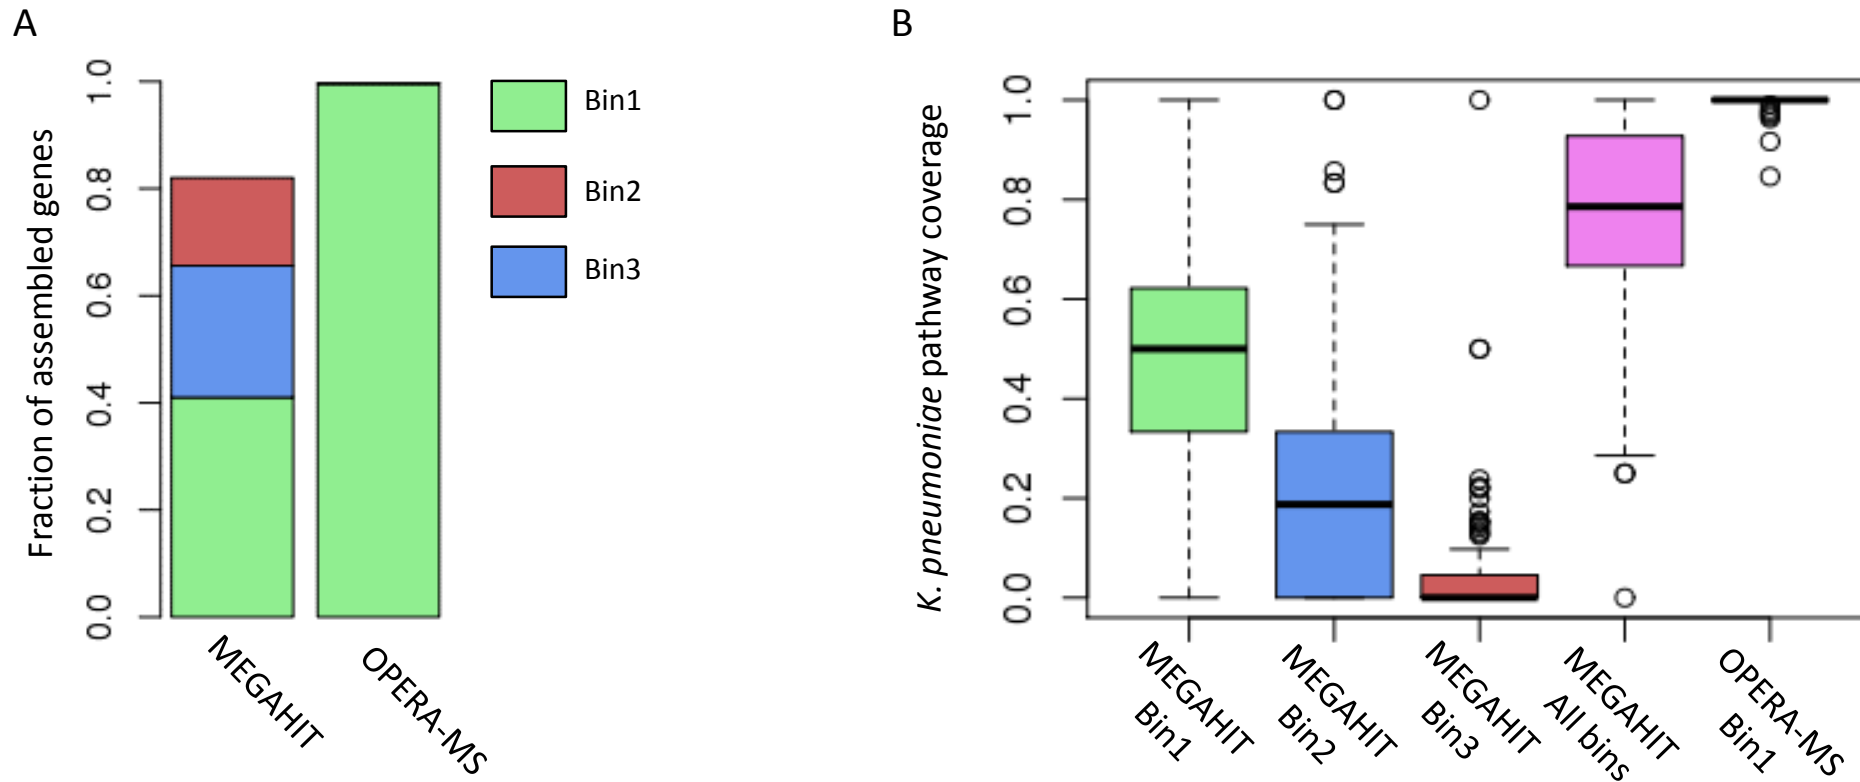

**Supplementary Figure 9:** Comparison of assembly and binning performance between Illumina-only (MEGAHIT) and hybrid (OPERA-MS) assemblies in the presence of multiple strains of a species. (A) Fraction of genes from *Klebsiella pneumoniae* that are assembled and present in various contig bins using the two approaches. (B) Coverage of *Klebsiella pneumoniae* pathways (n=156) in various assembly bins. Note that despite the binning of Illumina-only contigs, the corresponding bins only cover a fraction of the genes and pathways present in *K. pneumoniae*, while the hybrid approach with OPERA-MS recovers the complete genome despite the presence of multiple *K. pneumoniae* strains in the metagenome. Data is presented as boxplots (center line, median; box limits, upper and lower quartiles; whiskers, 1.5× interquartile range; points, outliers)

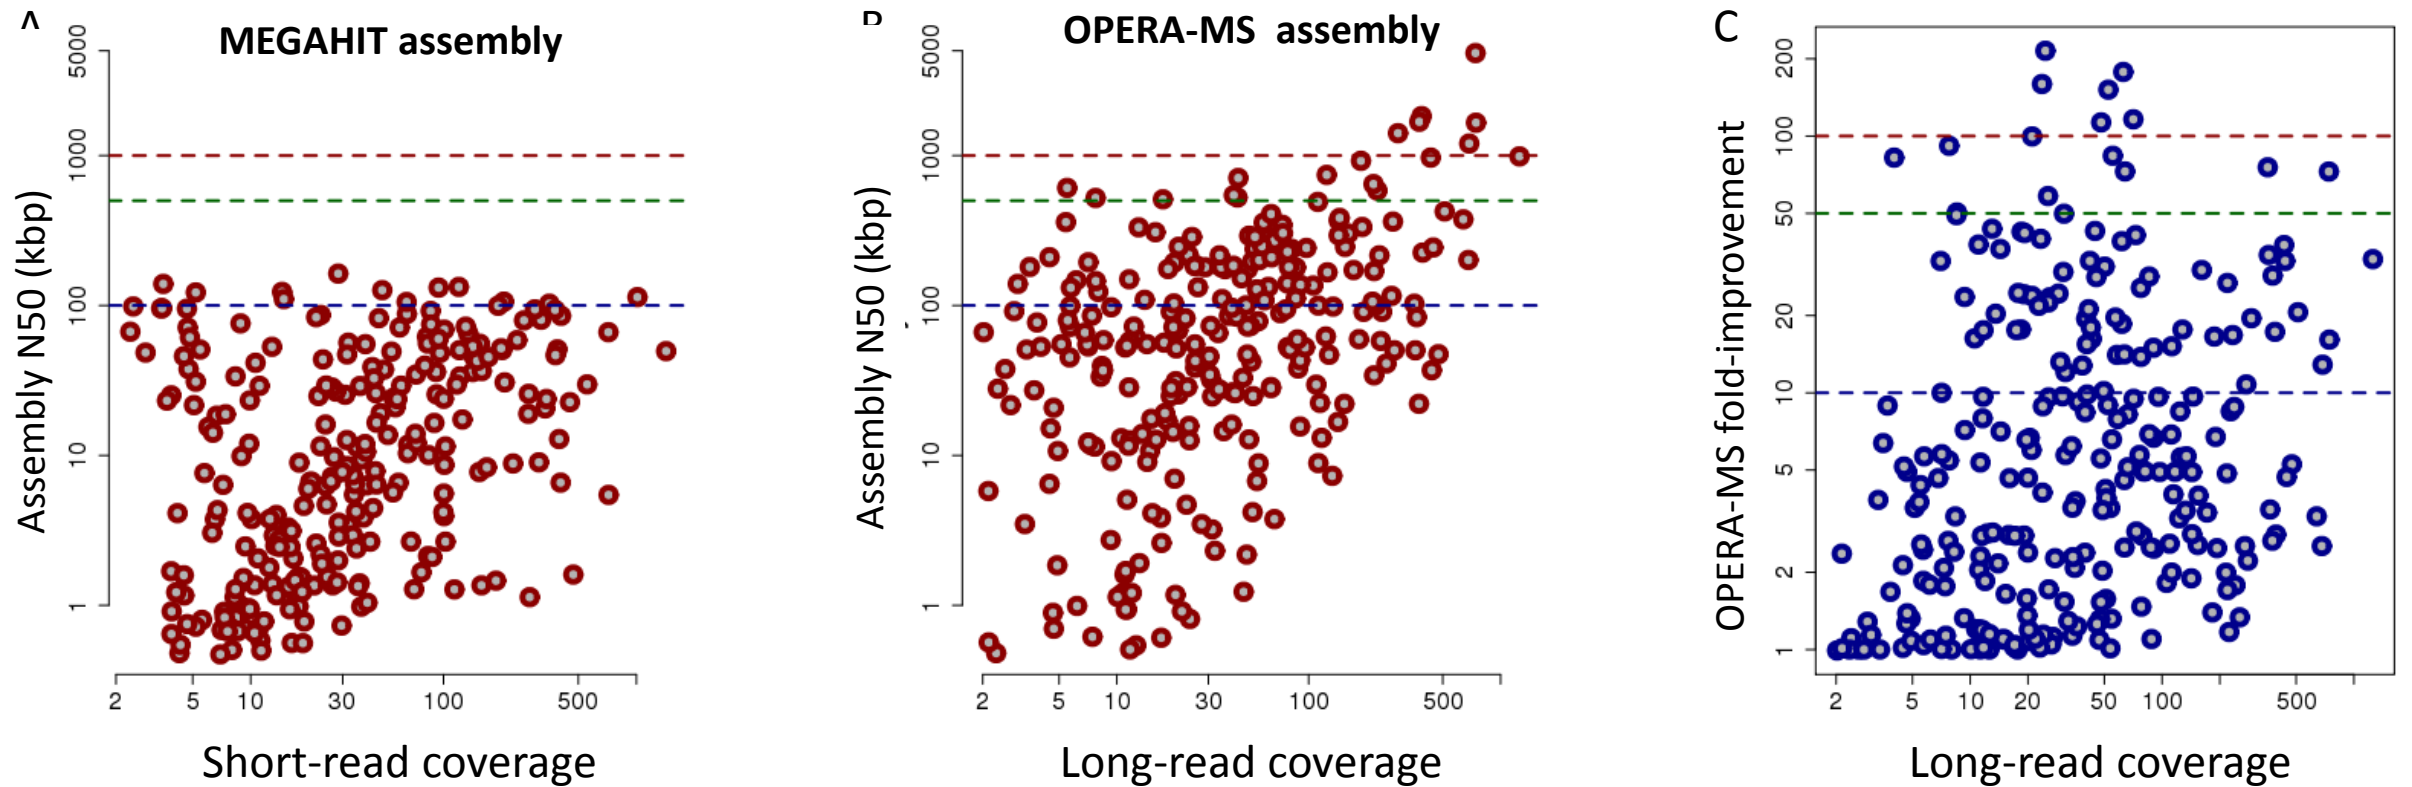

**Supplementary Figure 10:** Overview of genome assemblies obtained for 28 gut microbiomes with nanopore sequencing data. N50 of assembled species (those with >1Mbp of sequence with Kraken hits) as a function of read coverage for (A) MEGAHIT and (B) OPERA-MS. (C) Assembly improvement provided by OPERA-MS compared to MEGAHIT as a function of read coverage. As was observed in the case of the mock communities, short-read assemblies plateau at an N50 of ~100kbp. In contrast, hybrid assemblies continue to scale and enable highly contiguous assemblies, with >90 genomes with N50 >100kbp and the assembly of 6 near complete genomes (N50 >1Mbp).

## MEGAHIT

109 genomes

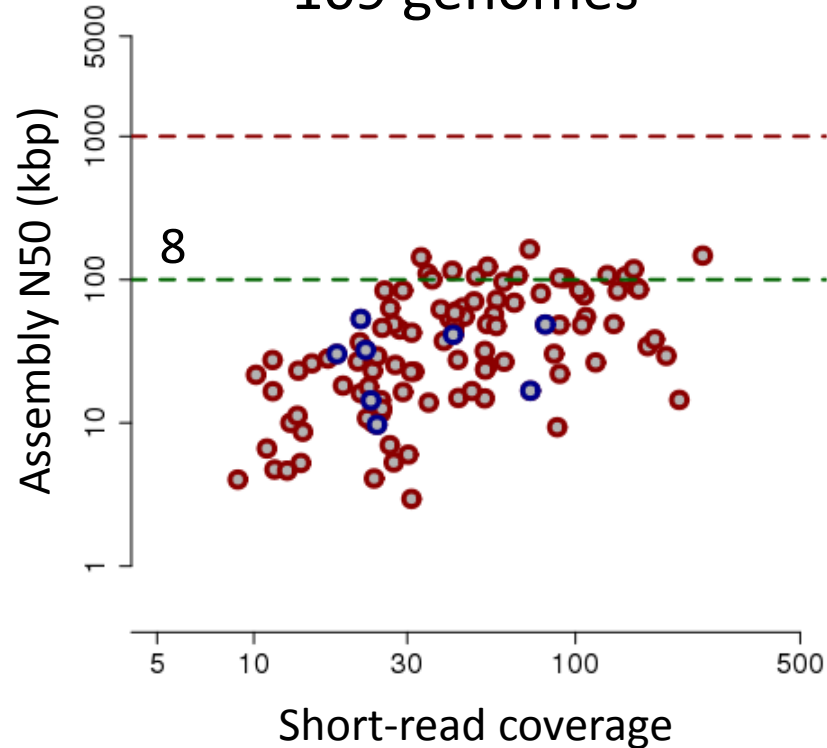

## hybridSPAdes

116 genomes

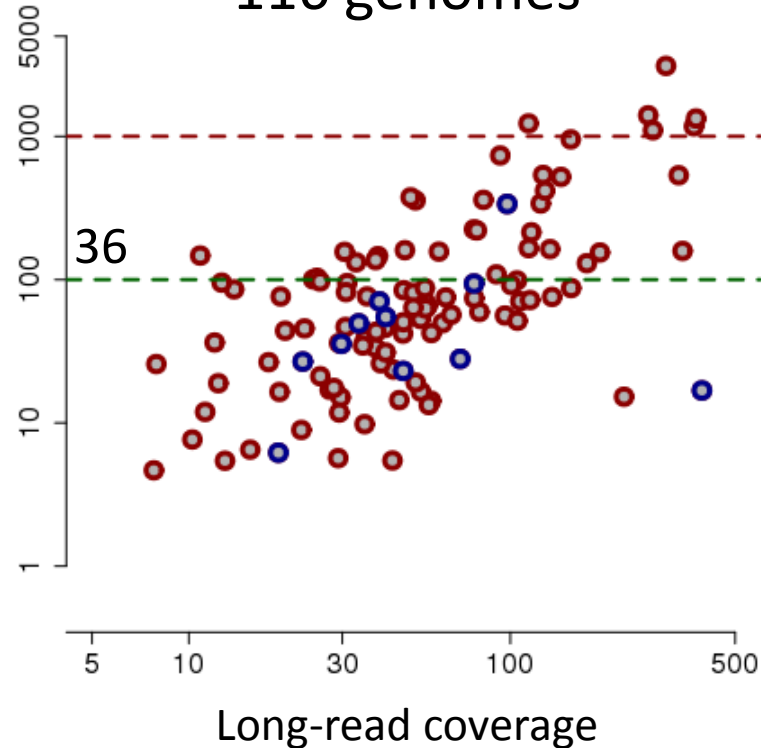

## OPERA-MS

138 genomes

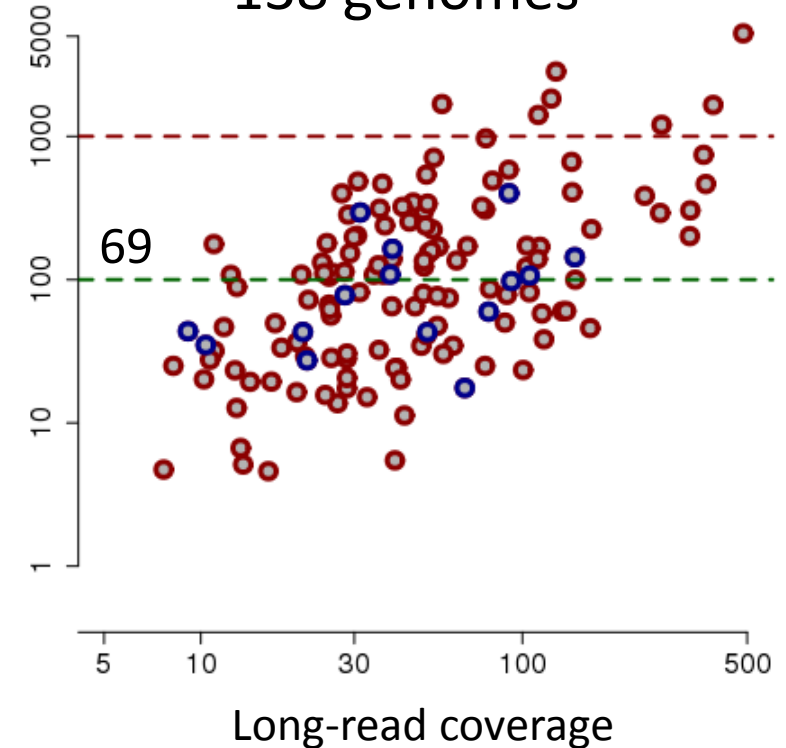

**Supplementary Figure 11:** Assembly of high quality draft genomes from 28 gut microbiomes with nanopore sequencing data. The graphs show N50 of assembled genomes (after binning) as a function of read coverage. Assembly bins from MaxBin2 were evaluated using CheckM (v1.0.7, --reduced\_tree) and bins with completeness >90% and contamination <5% were considered high quality genomes. Pink dots represent species where multiple genomes are present in the metagenome. Overall, OPERA-MS assembles the most high-quality genomes (n=138), many of which have N50 >100kbp (n=69). Also, in cases where there are multiple genomes for a species, OPERA-MS produces more genomes with high N50 (n=8) compared to hybridSPAdes (n=1).

A

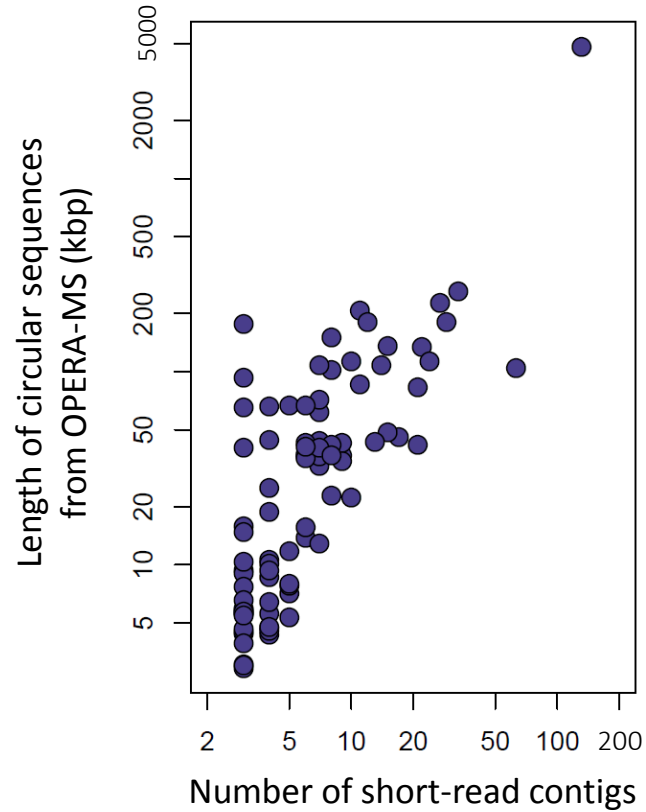

B

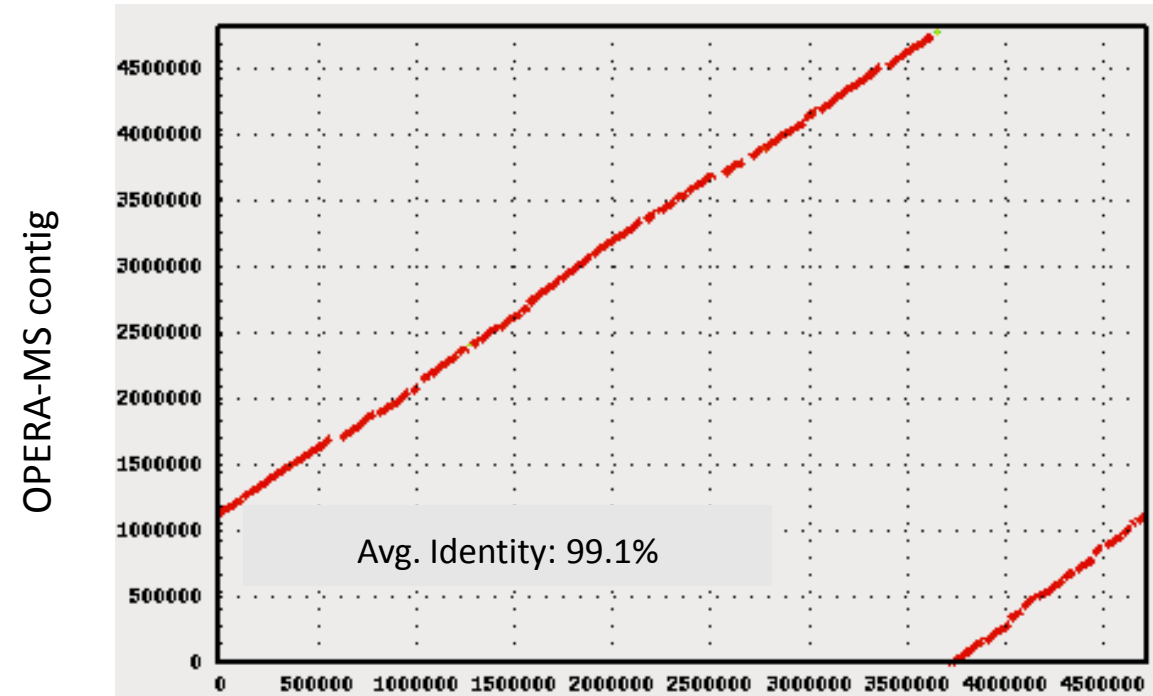

*Enterobacter cloacae* subsp. *cloacae* strain ENHKU01

**Supplementary Figure 12:** OPERA-MS assembles closed circular sequences from stool metagenomic data. (A) The closed circular contigs assembled by OPERA-MS are frequently quite fragmented in the MEGAHIT assembly. (B) The longest circular sequence assembled by OPERA-MS seems to be the complete genome for an *Enterobacter cloacae* strain in the metagenome that shows high structural similarity and sequence identity to the reference genome for *Enterobacter cloacae* subsp. *cloacae* strain ENHKU01. Note that this genome was part of our reference database which enabled rescue of 13 assembly graph edges (out of 263 in total) and helped merge 8 original clusters.

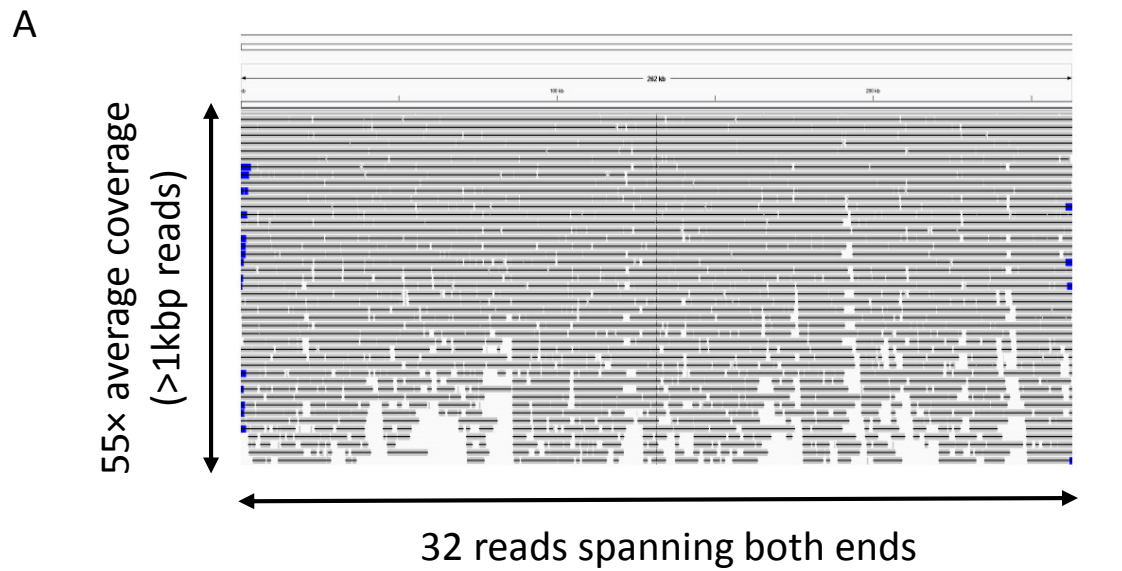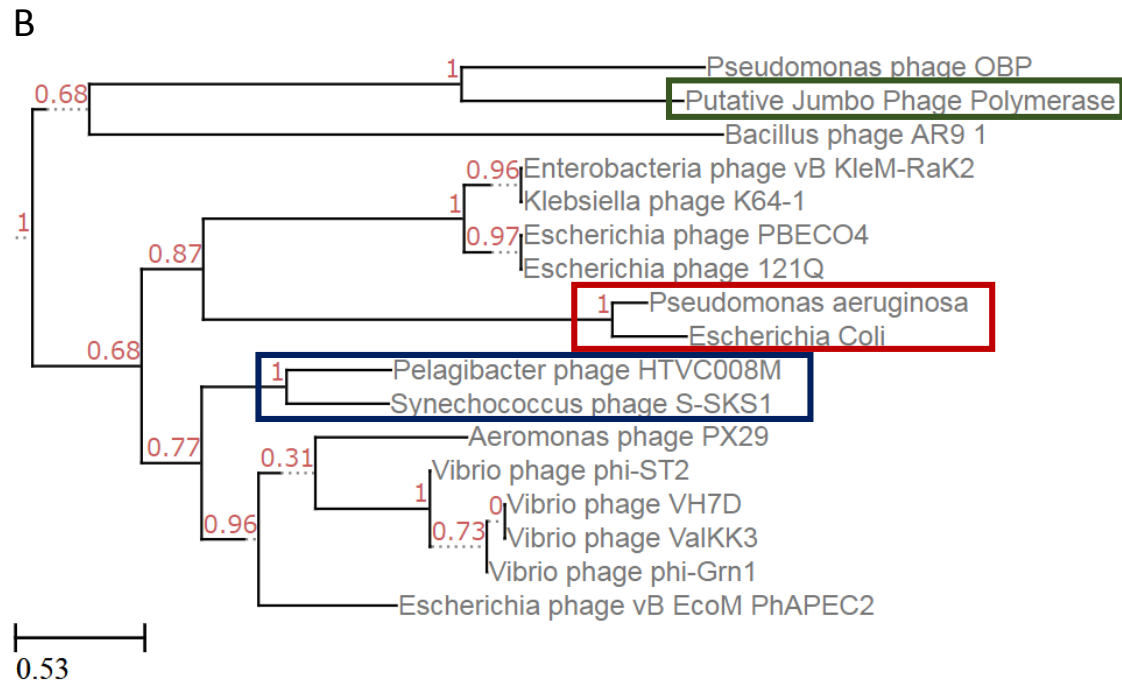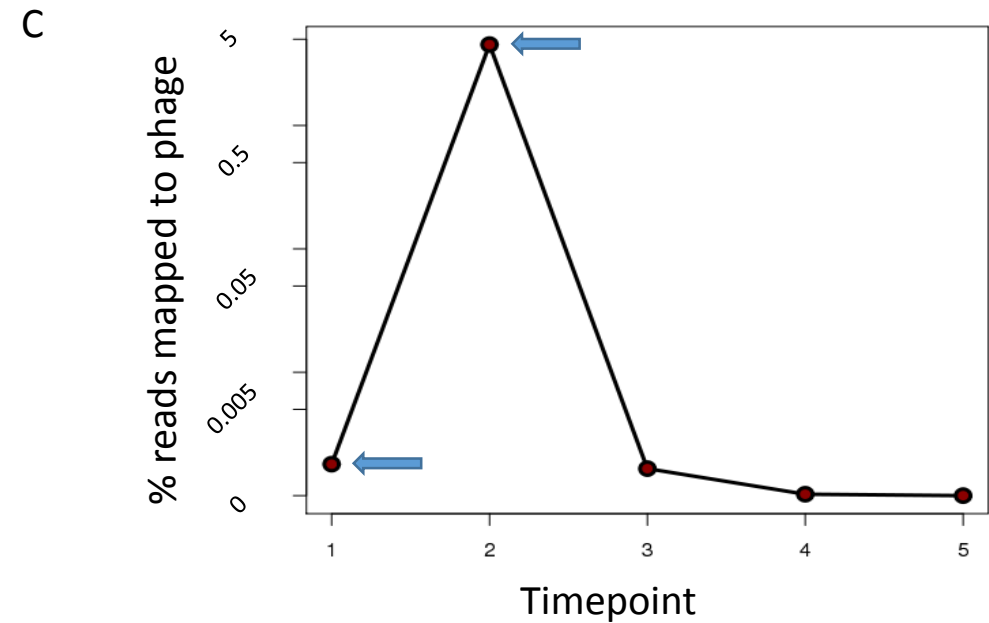

**Supplementary Figure 13:** (A) Uniform coverage of >1kbp long ONT reads across the 263kbp sequence of the putative jumbo phage. (B) Maximum likelihood phylogenetic tree based on DNA polymerase group B protein sequences from bacteria (red box), small phages (blue box), and jumbo phages (not boxed). The DNA polymerase B protein from the putative jumbo phage genome assembled by OPERA-MS (green box) clustered with other jumbo phage proteins. Numbers on the branches indicate bootstrap confidence values based on 500 replicates. (C) Fraction of metagenomic reads that mapped to the jumbo phage genome. Start and end days for antibiotic treatment are marked with arrows.

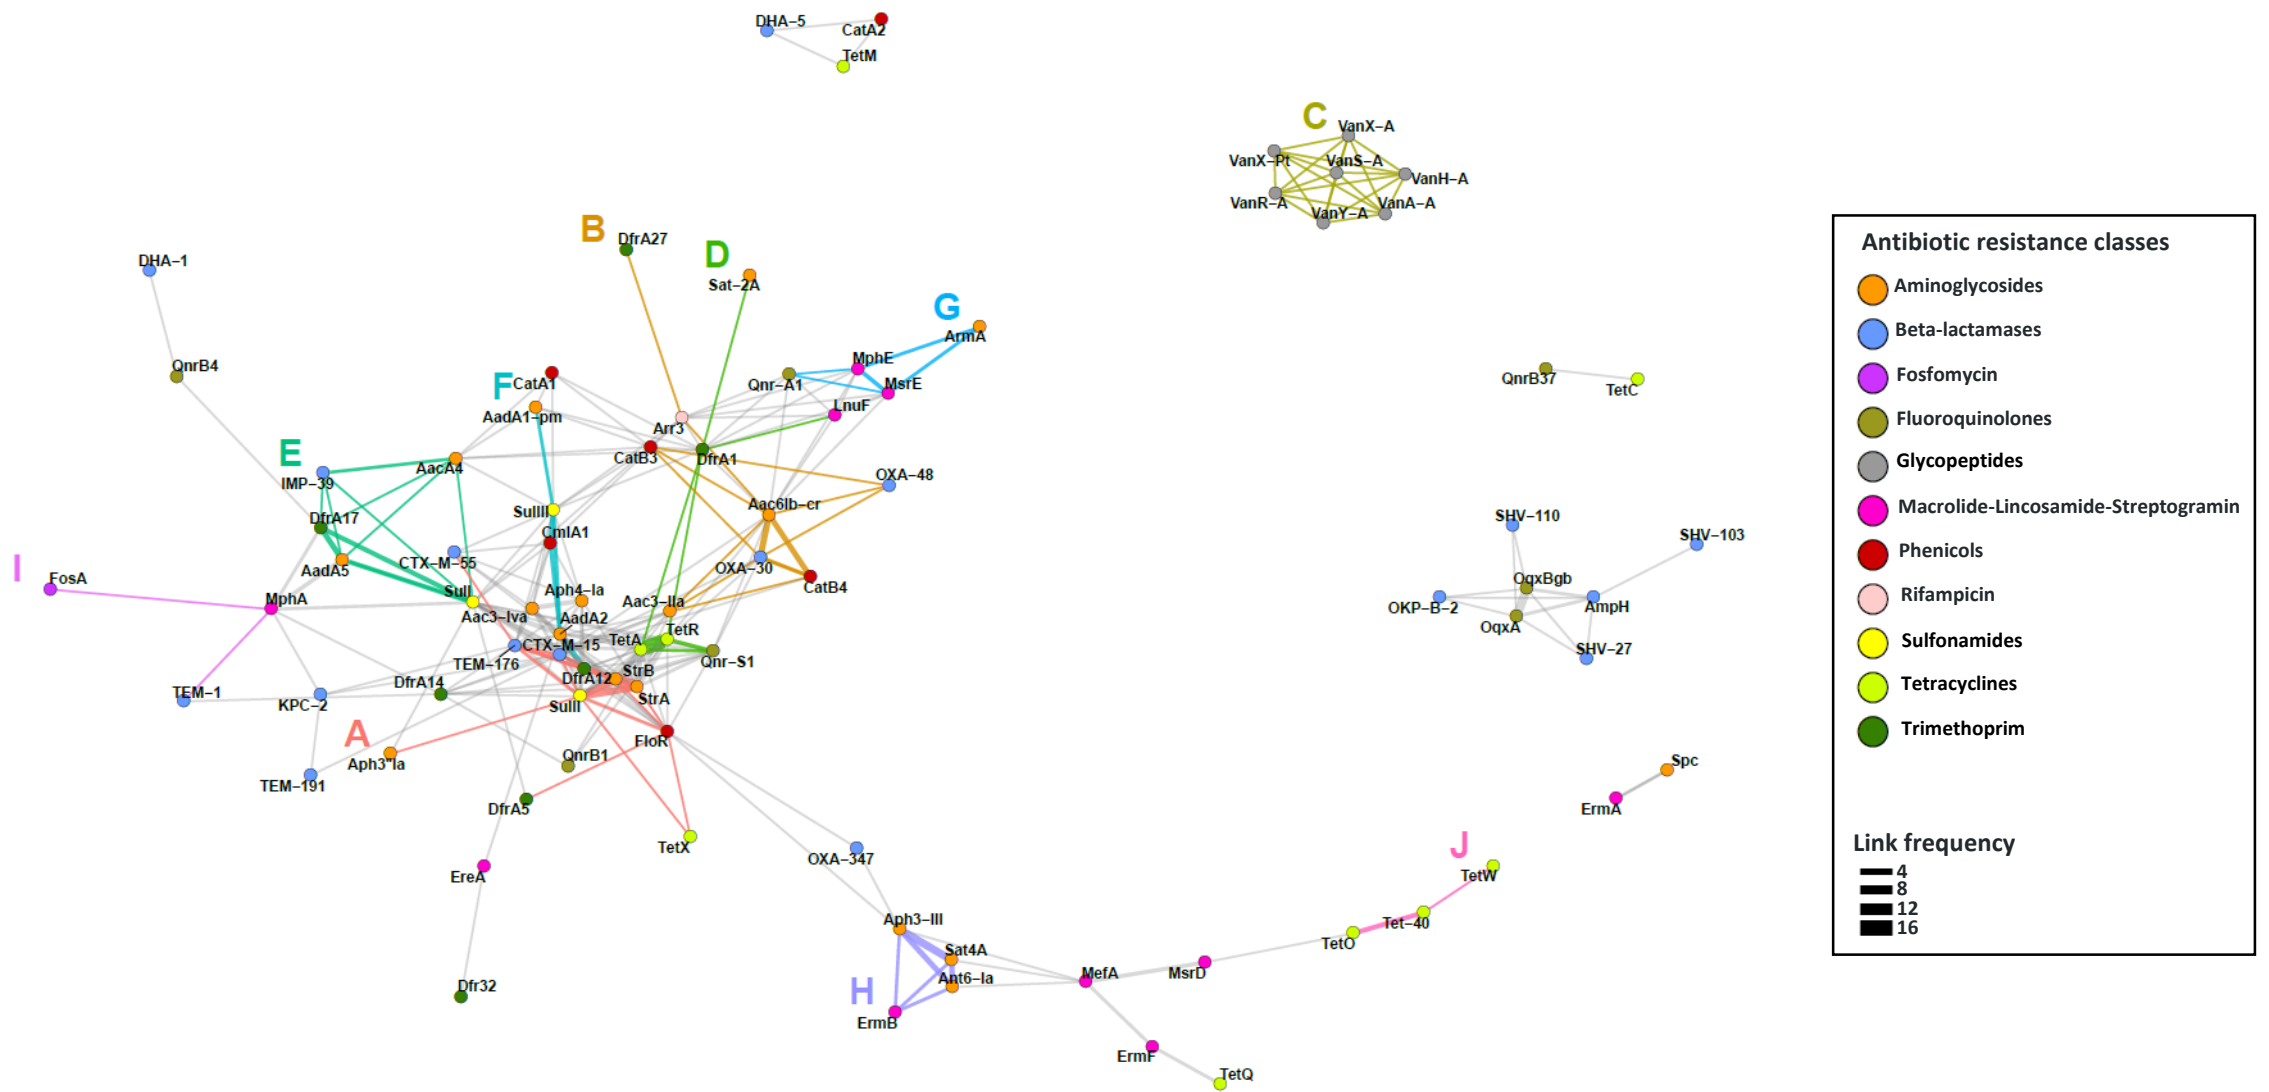

**Supplementary Figure 14:** Genomic linkage of AR genes and identification of common cassettes in the gut microbiome. Edges between genes indicate genetic linkage (<5kbp apart; grey otherwise) based on the 28 gut metagenomes analyzed. Markov clustering on the network was used to identify AR gene cassettes that tend to co-occur. Edges are color-coded according to their respective clusters (A-J) while resistance genes are color-coded according to the antibiotic classes that they can confer resistance to.



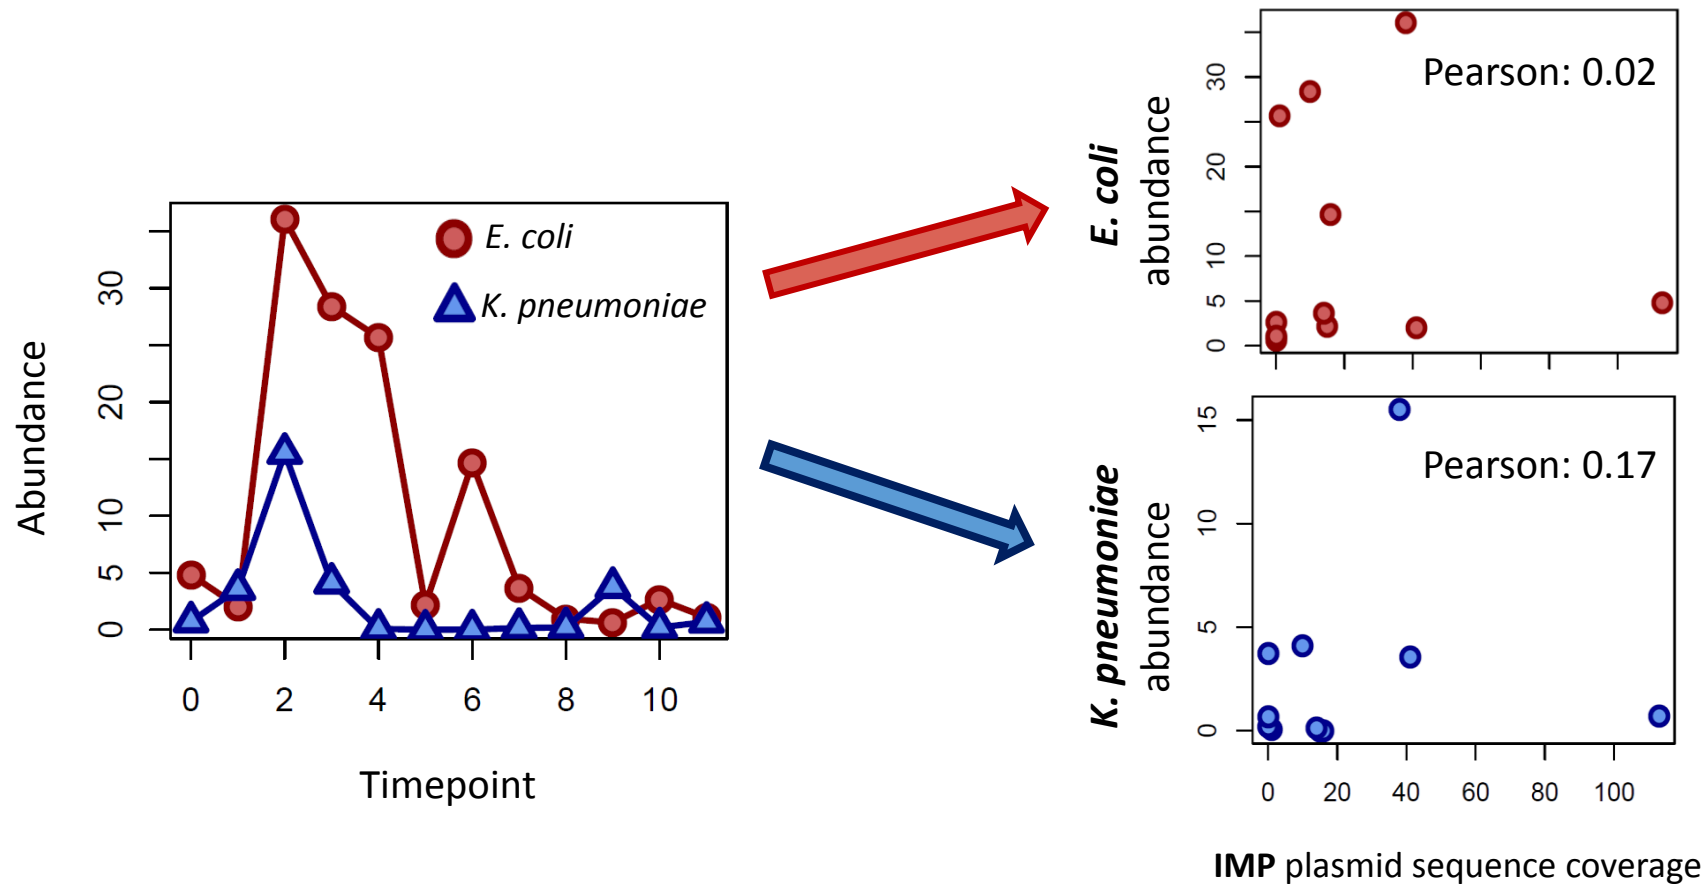

**Supplementary Figure 15:** Species level analysis (n=12 samples) detects no correlation between abundance of two *Enterobacteriaceae* species (*E. coli* and *K. pneumoniae*) over time and the abundance of a plasmid containing a beta-lactamase gene (IMP).



A

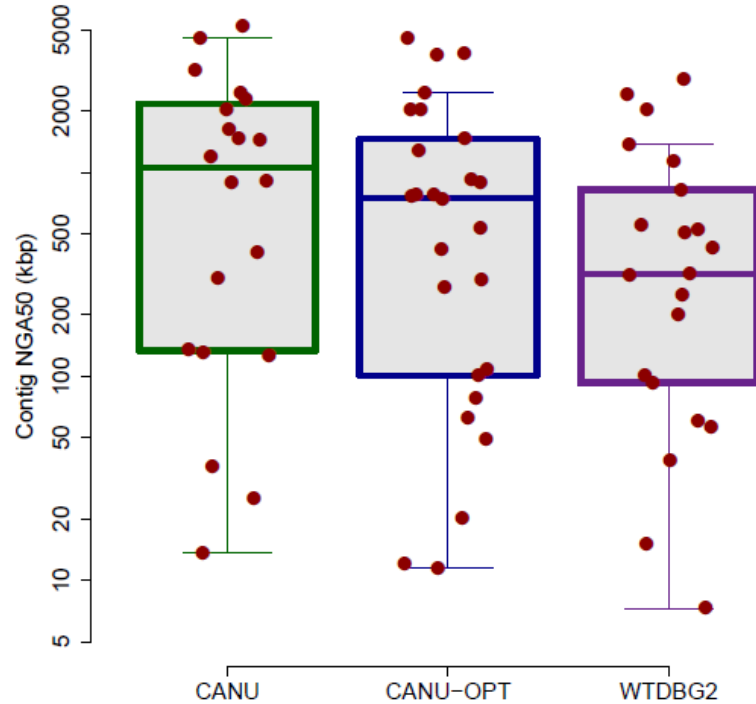

B

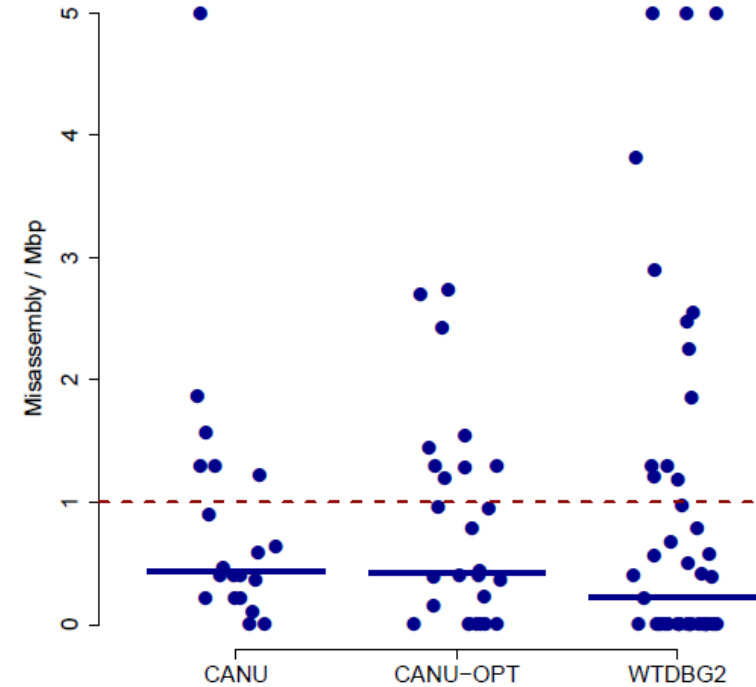

**Supplementary Figure 16:** Performance of long read assemblers for metagenomic assembly. We compared Canu with default settings as used for the results in the manuscript, with alternate parameter settings (CANU-OPT, recommended for metagenomic assembly; corOutCoverage=10000 corMhapSensitivity=high corMinCoverage=0), and WTDBG2 (default setting), and observed that it has (A) higher assembly contiguity (median NGA50) where data is presented as boxplots (center line, median; box limits, upper and lower quartiles; whiskers, 1.5× interquartile range; points, outliers), and (B) slightly higher misassembly rate (centre value represents the median). In each figure, each data point represents one assembled genome from the mock communities (n=20, 26 and 21 for CANU, CANU-OPT and WTDBG2 respectively).

| Assembly method     | Single or multi-sample analysis | Sequence data                            | Metagenomics specific | Assembly contiguity (NGA50) | Strain deconvolution | Software website                                                                                                                    |
|---------------------|---------------------------------|------------------------------------------|-----------------------|-----------------------------|----------------------|-------------------------------------------------------------------------------------------------------------------------------------|
| <b>MGS Canopy</b>   | Multi-sample                    | Illumina                                 | Yes                   | <100kbp                     | No                   | <a href="https://bitbucket.org/HeyHo/mgs-canopy-algorithm/wiki/Home">https://bitbucket.org/HeyHo/mgs-canopy-algorithm/wiki/Home</a> |
| <b>MEGAHIT</b>      | Single                          | Illumina                                 | Yes                   | <100kbp                     | No                   | <a href="https://github.com/voutcn/megahit">https://github.com/voutcn/megahit</a>                                                   |
| <b>metaSPAdes</b>   | Single                          | Illumina                                 | Yes                   | <100kbp                     | No                   | <a href="http://cab.spbu.ru/software/spades/">http://cab.spbu.ru/software/spades/</a>                                               |
| <b>IDBA-UD</b>      | Single                          | Illumina                                 | Yes                   | <100kbp                     | No                   | <a href="https://github.com/loneknightpy/idba">https://github.com/loneknightpy/idba</a>                                             |
| <b>Canu</b>         | Single                          | PacBio/Nanopore/Illumina -SLR            | No                    | 100kbp-1Mbp                 | No                   | <a href="https://github.com/marbl/canu">https://github.com/marbl/canu</a>                                                           |
| <b>WTDBG2</b>       | Single                          | PacBio/Nanopore/Illumina -SLR            | No                    | 100kbp-1Mbp                 | No                   | <a href="https://github.com/ruanjue/wtdbg2">https://github.com/ruanjue/wtdbg2</a>                                                   |
| <b>hybridSPAdes</b> | Single                          | Illumina + PacBio/Nanopore/Illumina -SLR | No                    | 100kbp-1Mbp                 | No                   | <a href="http://cab.spbu.ru/software/spades/">http://cab.spbu.ru/software/spades/</a>                                               |
| <b>Athena</b>       | Single                          | Illumina +10x read cloud                 | No                    | 100kbp-1Mbp                 | No                   | <a href="https://github.com/abishara/athena_meta/">https://github.com/abishara/athena_meta/</a>                                     |
| <b>OPERA-MS</b>     | Single                          | Illumina + PacBio/Nanopore/Illumina -SLR | Yes                   | 100kbp-1Mbp                 | Yes                  | <a href="https://github.com/CSB5/OPERA-MS">https://github.com/CSB5/OPERA-MS</a>                                                     |

**Supplementary Table 1:** Attributes of various assembly algorithms that have been used for metagenomic assembly. Assembly contiguity values give an indication of expected performance assuming sufficient read coverage for the genome of interest (typically >10-30×).

| Sample ID | Patient ID     | Throughput (Mbp) | Number of reads (thousands) | Read N50 (kbp) | ONT sequencer | ONT flow cell | Technique used | Kit        | Basecaller                           |
|-----------|----------------|------------------|-----------------------------|----------------|---------------|---------------|----------------|------------|--------------------------------------|
| S1        | 818VB-3        | 444              | 28                          | 4.9            | MinION        | R9            | HMW            | NSK007     | RNN SQK007 1.107                     |
| S2        | 631RZ-6        | 582              | 124                         | 1.0            | MinION        | R9 spoton     | HMW            | SQK-LSK208 | 2D flo106 250bps 1.125               |
| S3        | 631RZ-5        | 70               | 5                           | 4.2            | MinION        | R9 spoton     | WGA            | SQK-LSK208 | 2D flo106 250bps 1.125               |
| S4        | 135EA6         | 1124             | 150                         | 2.0            | MinION        | R9 spoton     | HMW            | SQK-LSK208 | 2D flo106 250bps 1.125               |
| S5        | 948BA1         | 1115             | 426                         | 0.6            | MinION        | R9 spoton     | HMW            | SQK-LSK208 | 2D flo106 250bps 1.125               |
| S6        | V01-T-0506-S02 | 1006             | 106                         | 2.5            | MinION        | R9 spoton     | Normal         | SQK-LSK208 | Albacore                             |
| S7        | V03-T-0506-S04 | 1632             | 123                         | 4.0            | MinION        | R9 spoton     | Normal         | SQK-LSK208 | Albacore                             |
| S8        | V02-S-0510-S03 | 325              | 60                          | 1.3            | MinION        | R9.5 spoton   | Normal         | SQK-LSK208 | Albacore                             |
| S9        | V06-T-0502-S07 | 2438             | 172                         | 5.1            | MinION        | R9.5 spoton   | BluePippin     | SQK-LSK208 | Albacore                             |
| S10       | V05-T-0502-S06 | 3106             | 665                         | 1.1            | MinION        | R9.5 spoton   | Normal         | SQK-LSK208 | Albacore                             |
| S11       | V03-T-0508-S04 | 7996             | 393                         | 6.4            | MinION        | R9.5 spoton   | Normal         | SQK-LSK208 | Albacore                             |
| S12       | V00-S-0509-S01 | 4218             | 333                         | 3.6            | MinION        | R9.5 spoton   | Size Select    | SQK-LSK208 | Albacore                             |
| S13       | V02-T-0504-S03 | 7255             | 1032                        | 2.0            | MinION        | R9.5 spoton   | Size Select    | SQK-LSK208 | Albacore                             |
| S14       | V06-T-0501-S07 | 3190             | 511                         | 1.8            | GridION       | R9.5 spoton   | Normal         | SQK-LSK208 | Guppy v0.3.0 for live 1D basecalling |
| S15       | V00-S-0511-S01 | 2677             | 1345                        | 0.7            | GridION       | R9.5 spoton   | Size Select    | SQK-LSK208 | Guppy v0.3.0 for live 1D basecalling |
| S16       | V04-S-0509-S04 | 2572             | 629                         | 1.2            | GridION       | R9.5 spoton   | Size Select    | SQK-LSK208 | Guppy v0.3.0 for live 1D basecalling |
| S17       | V05-S-0512-S05 | 1990             | 540                         | 1.1            | GridION       | R9.5 spoton   | Normal         | SQK-LSK208 | Guppy v0.3.0 for live 1D basecalling |
| S18       | V05-T-0513-S05 | 2541             | 514                         | 1.4            | GridION       | R9.5 spoton   | Size Select    | SQK-LSK208 | Guppy v0.3.0 for live 1D basecalling |
| S19       | V07-S-0512-S07 | 5307             | 430                         | 4.3            | GridION       | R9.5 spoton   | Normal         | SQK-LSK208 | Guppy v0.3.0 for live 1D basecalling |
| S20       | V02-T-1664-S03 | 5412             | 275                         | 6.2            | GridION       | R9.5 spoton   | Normal         | SQK-LSK208 | Guppy v0.3.0 for live 1D basecalling |
| S21       | V02-T-1665-S03 | 4260             | 308                         | 3.7            | GridION       | R9.5 spoton   | Normal         | SQK-LSK208 | Guppy v0.3.0 for live 1D basecalling |
| S22       | V03-S-1663-S04 | 2517             | 618                         | 1.0            | GridION       | R9.5 spoton   | Normal         | SQK-LSK208 | Guppy v0.3.0 for live 1D basecalling |
| S23       | V03-S-0457-S04 | 2714             | 394                         | 1.5            | GridION       | R9.5 spoton   | Normal         | SQK-LSK208 | Guppy v0.3.0 for live 1D basecalling |
| S24       | V03-T-0504-S04 | 5870             | 537                         | 3.1            | GridION       | R9.5 spoton   | Size Select    | SQK-LSK208 | Guppy v0.3.0 for live 1D basecalling |
| S25       | V04-T-0508-S05 | 3167             | 233                         | 4.0            | GridION       | R9.5 spoton   | Size Select    | SQK-LSK208 | Guppy v0.3.0 for live 1D basecalling |
| S26       | V07-T-0504-S08 | 4308             | 559                         | 2.0            | GridION       | R9.5 spoton   | Size Select    | SQK-LSK208 | Guppy v0.3.0 for live 1D basecalling |
| S27       | V07-S-0510-S08 | 4940             | 561                         | 2.5            | GridION       | R9.5 spoton   | Size Select    | SQK-LSK208 | Guppy v0.3.0 for live 1D basecalling |
| S28       | V08-S-0510-S09 | 5233             | 507                         | 2.8            | GridION       | R9.5 spoton   | Size Select    | SQK-LSK208 | Guppy v0.3.0 for live 1D basecalling |

**Supplementary Table 2:** ONT sequencing protocols and statistics for stool metagenomics. Technique used: HMW (High Molecular Weight Extraction protocol), WGA (Whole Genome Amplification), Normal (extraction protocol used for shotgun libraries), BluePippin (size selection from 3-50kb), Size Select (size selection with 0.45X AMPure XP).

| Strain ID    | Name                                                                         | Mass (in $\mu\text{g}$ ) | Relative Abundance (%) | Reference Genome                    |
|--------------|------------------------------------------------------------------------------|--------------------------|------------------------|-------------------------------------|
| ATCC 39213   | <i>Pseudomonas putida</i>                                                    | 69                       | 30.00%                 | NA                                  |
| ATCC 700721  | <i>Klebsiella pneumoniae</i>                                                 | 46                       | 20.00%                 | NC_009648                           |
| ATCC 17978   | <i>Acinetobacter baumannii</i>                                               | 34.5                     | 15.00%                 | GCF_001077675.1_ASM107767v1_genomic |
| ATCC 12228   | <i>Staphylococcus epidermidis</i>                                            | 23                       | 10.00%                 | NC_004461                           |
| ATCC BAA-472 | <i>Enterococcus faecium</i>                                                  | 16.1                     | 7.00%                  | NC_017960                           |
| ATCC 13311   | <i>Salmonella enterica</i> subsp. <i>enterica</i> serovar <i>typhimurium</i> | 11.5                     | 5.00%                  | GCF_000743055.1_ASM74305v1_genomic  |
| DSM17610     | <i>Neisseria subflava</i>                                                    | 6.9                      | 3.00%                  | NA                                  |
| DSM 7271     | <i>Capnocytophaga ochracea</i>                                               | 6.9                      | 3.00%                  | NC_013162                           |
| DSM20016     | <i>Lactobacillus reuteri</i>                                                 | 3.45                     | 1.50%                  | NC_010609                           |
| DSM 20219    | <i>Bifidobacterium longum</i>                                                | 3.45                     | 1.50%                  | NC_015067                           |
| DSM 22815    | <i>Jonquetella anthropi</i>                                                  | 2.3                      | 1.00%                  | GCF_000237805.1_ASM23780v1_genomic  |
| DSM20472     | <i>Fingoldia magna</i>                                                       | 1.15                     | 0.50%                  | NC_010376                           |
| DSM 30054    | <i>Enterobacter cloacae</i>                                                  | 1.15                     | 0.50%                  | NC_014121                           |
| DSM 15702    | <i>Eubacterium siraeum</i>                                                   | 1.15                     | 0.50%                  | NA                                  |
| DSM 20083    | <i>Bifidobacterium adolescentis</i>                                          | 0.575                    | 0.25%                  | NC_008618                           |
| DSM 6778     | <i>Streptococcus parasanguinis</i>                                           | 0.575                    | 0.25%                  | NC_015678                           |
| DSM 20482    | <i>Fusobacterium nucleatum</i> subsp. <i>polymorphum</i>                     | 0.575                    | 0.25%                  | GCF_000153625.3_ASM15362v1_genomic  |
| DSM 18711    | <i>Prevotella oris</i>                                                       | 0.23                     | 0.10%                  | GCF_000377685.1_ASM37768v1_genomic  |
| DSM5359      | <i>Helicobacter cinaedi</i>                                                  | 0.23                     | 0.10%                  | NC_020555                           |
| DSM 10105    | <i>Parascardovia denticolens</i>                                             | 0.23                     | 0.10%                  | GCF_000191785.1_ASM19178v1_genomic  |

**Supplementary Table 3:** GIS20 mock community composition.

| Sequencing run | Throughput (Mbp) | Number of reads (thousands) | N50 (kbp)  | ONT flow cell | Kit    | Basecaller      |
|----------------|------------------|-----------------------------|------------|---------------|--------|-----------------|
| 1              | 238              | 9                           | 9.4        | R7            | MAP006 | RNN SQK007 1.69 |
| 2              | 415              | 17                          | 8.6        | R7            | MAP006 | RNN SQK007 1.69 |
| 3              | 267              | 7                           | 12.1       | R7            | MAP006 | RNN SQK007 1.69 |
| 4              | 188              | 4                           | 14.7       | R7            | MAP006 | RNN SQK007 1.69 |
| 5              | 480              | 22                          | 8.0        | R9            | NSK007 | RNN SQK007 1.97 |
| 6              | 859              | 34                          | 9.3        | R9            | NSK007 | RNN SQK007 1.99 |
| <b>TOTAL</b>   | <b>2,446</b>     | <b>91</b>                   | <b>9.2</b> |               |        |                 |

**Supplementary Table 4:** MinION sequencing statistics for the GIS20 mock community.

| Gene Name                                            | Associated Antibiotic Resistance                                           |
|------------------------------------------------------|----------------------------------------------------------------------------|
| Aac3-Iva Aph4-Ia TEM-176 CmlA1 SulIII AadA2 CTX-M-55 | aminoglycoside(3), cephalosporin(2), phenicol, sulfone                     |
| DfrA17 Sull AadA5 AacA4 IMP-39                       | diaminopyrimidine, sulfone, aminoglycoside(2), carbapenem                  |
| Sull CmlA1 Arr3 SulIII                               | sulfone(2), phenicol, rifamycin                                            |
| OXA-48 OXA-30 CatB3 Aac6Ib-cr                        | carbapenem/cephalosporin, penam, phenicol, fluoroquinolone, aminoglycoside |
| Aph3-III ErmB Ant6-Ia Sat4A                          | aminoglycoside(2), lincosamide, nucleoside                                 |
| OXA-30 Aac6Ib-cr Qnr-S1                              | penam, fluoroquinolone(2), aminoglycoside                                  |
| OXA-30 Aac6Ib-cr CatB4                               | penam, fluoroquinolone, aminoglycoside, phenicol                           |
| CmlA1 AadA2 SulIII                                   | phenicol, aminoglycoside, sulfone                                          |
| SulIII CmlA1 AadA2                                   | sulfone, phenicol, aminoglycoside                                          |
| Aph3-III Ant6-Ia Sat4A                               | aminoglycoside(2), nucleoside                                              |
| OXA-30 Aac6Ib-cr CatB4                               | penam, fluoroquinolone, aminoglycoside, phenicol                           |
| KPC-2 TEM-191 CTX-M-15                               | carbapenem, cephalosporin(2)                                               |
| OXA-30 Aac6Ib-cr CatB4                               | penam, fluoroquinolone, aminoglycoside, phenicol                           |
| Aph3-III OXA-347 FloR                                | aminoglycoside, penam, phenicol                                            |
| KPC-2 MphA                                           | carbapenem, macrolide                                                      |
| SulIII TEM-176                                       | sulfone, cephalosporin                                                     |
| Aac6Ib-cr CatB4                                      | fluoroquinolone, aminoglycoside, phenicol                                  |
| ErmA Spc                                             | lincosamide, aminoglycoside                                                |
| TetO Tet-40                                          | tetracycline(2)                                                            |
| TetX FloR                                            | tetracycline, phenicol                                                     |
| Tet-40 TetO                                          | tetracycline(2)                                                            |
| TetW Tet-40                                          | tetracycline(2)                                                            |
| QnrB4 DfrA17                                         | fluoroquinolone, diaminopyrimidine                                         |
| Aph3 <sup>III</sup> Sull                             | aminoglycoside, sulfone                                                    |

**Supplementary Table 5** : Novel antibiotic resistance gene combinations identified.

## Supplementary Note 1: Impact of technology-specific and Illumina polishing on base-pair level accuracy of long-read assembly

We evaluated the base-pair level accuracy of Canu long-read only assemblies using different polishing approaches. In addition to the default approach of using Racon which is technology agnostic, we evaluated the use of Quiver<sup>1</sup> for PacBio reads and Nanopolish<sup>2</sup> for nanopore reads. As expected, using Quiver improved the accuracy of the Pacbio assemblies further but many genomes still continue to have low quality, likely due to shallow coverage for these genomes (**Supplementary Note Figure 1**). Improvement using Nanopolish was limited for nanopore assemblies, likely due to the lack of coverage in low abundance genomes. Finally, polishing with Illumina reads (using Pilon) provided accuracy that was closer to hybrid assemblies but OPERA-MS assemblies still had 1/5<sup>th</sup> of the errors (**Supplementary Figure 6**).

Note that a potential advantage of long-read assembly is its ability to resolve repeat regions better. We evaluated this property, using MUMmer self-alignments to identify repeat regions in the genome, and observed that while OPERA-MS improved notably over Canu assemblies for nanopore data (1/3<sup>rd</sup> of the errors), it showed slight improvements for Illumina synthetic long read and PacBio datasets (20% fewer base-pair errors) in such regions.

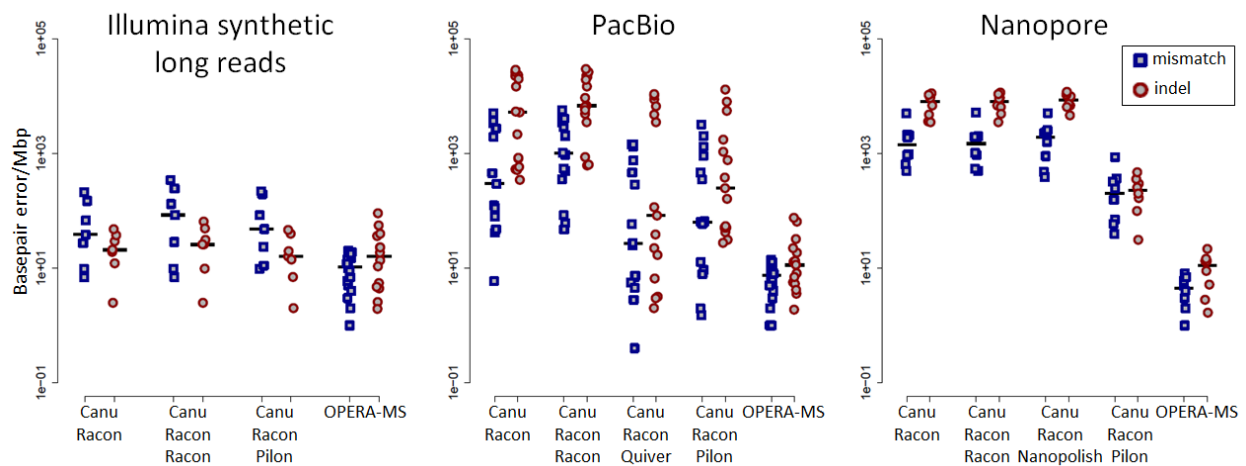

**Supplementary Note Figure 1:** Evaluation of base-pair level accuracy for Canu assemblies with different polishing steps (polishing steps are listed in order of use in the legend). Each dot represents results for a genome from the mock communities. Quiver (v2.2.2) and Nanopolish (v0.9.2; R9 model) were run with default settings.

## Supplementary Note 2: Utility of reference genomes for metagenomic assembly with OPERA-MS

To evaluate the utility of the reference-guided step in OPERA-MS, we ran OPERA-MS without this optional step (no reference), as well as with a database where species-level references were removed (genus-level reference), before analyzing the mock communities. In all settings, OPERA-MS provided assemblies with high median NGA50 compared to Illumina-only assemblies (**Supplementary Note Figure 2**). Notably, switching from having all references to only those at the genus-level resulted in no NGA50 reduction, while using no references led to ~20% reduction (median across genomes). The impact of references was felt under two conditions: (i) low read coverage (<5×), where references provided a 65% boost in median NGA50, or (ii) high coverage skew (>1.2), as can be seen in rapidly dividing bacteria<sup>3</sup>, with median NGA50 improvement of 25%. With the sequencing coverage generated in this study, we estimated that these conditions primarily impact less than half of the species with relative abundance <0.5% in the community. Additionally, we did not see an impact on the ability to assemble strain genomes in the presence of multiple strains in the virtual gut community (e.g. the dominant *K. pneumoniae* strain was still assembled into a 4.3Mbp contig with only 2 small errors).

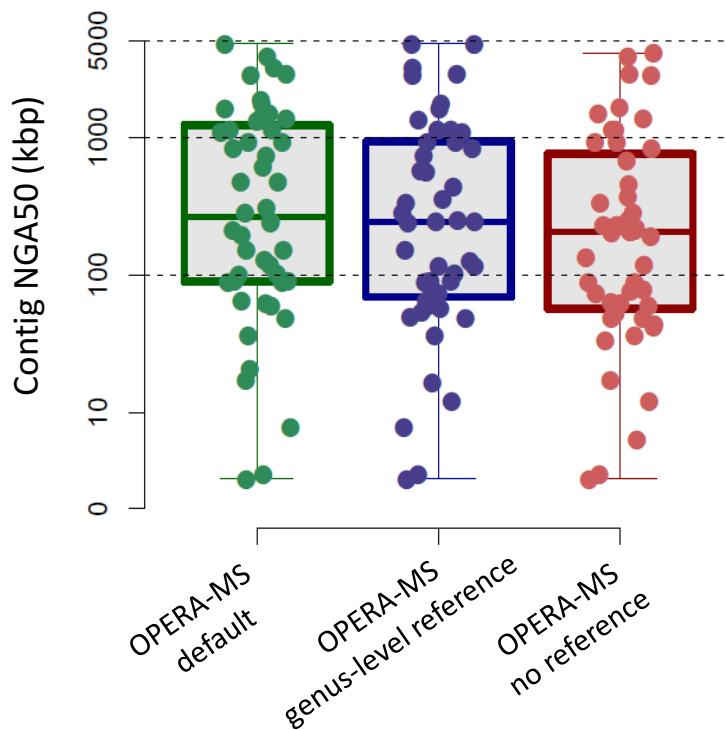

**Supplementary Note Figure 2:** Evaluation of utility of the reference-guided step for metagenomic assembly with OPERA-MS. We evaluated results on the mock communities with 3 settings: (i) default reference database, (ii) using a filtered genome database with no corresponding species-level references (genus-level reference), and (iii) using no references. Each dot in the figure represents an assembled genome in the mock communities.



### Supplementary Note 3: Sensitivity of Mash distance for identifying links between clusters

The Mash toolkit was used to estimate distances between contig clusters and reference genomes due to its computational efficiency<sup>4</sup>. As Mash uses kmer occurrences to measure Jaccard similarities, for small clusters we can expect a drop in sensitivity. This is indeed what we observed on the mock community, with sensitivity being as low as 40% for clusters shorter than 1kbp (**Supplementary Note Figure 3**). However, for clusters longer than 10kbp, sensitivity was greater than 90% and precision was consistently high in all cases (~95%). Correspondingly, we noted that hundreds of new links were correctly discovered for the mock communities (GIS20 Nanopore – 601, Pacbio – 454, HMP staggered mock Pacbio – 936, Illumina synthetic long read - 1037), especially for low coverage or high coverage skew genomes (see **Supplementary Note 2**).

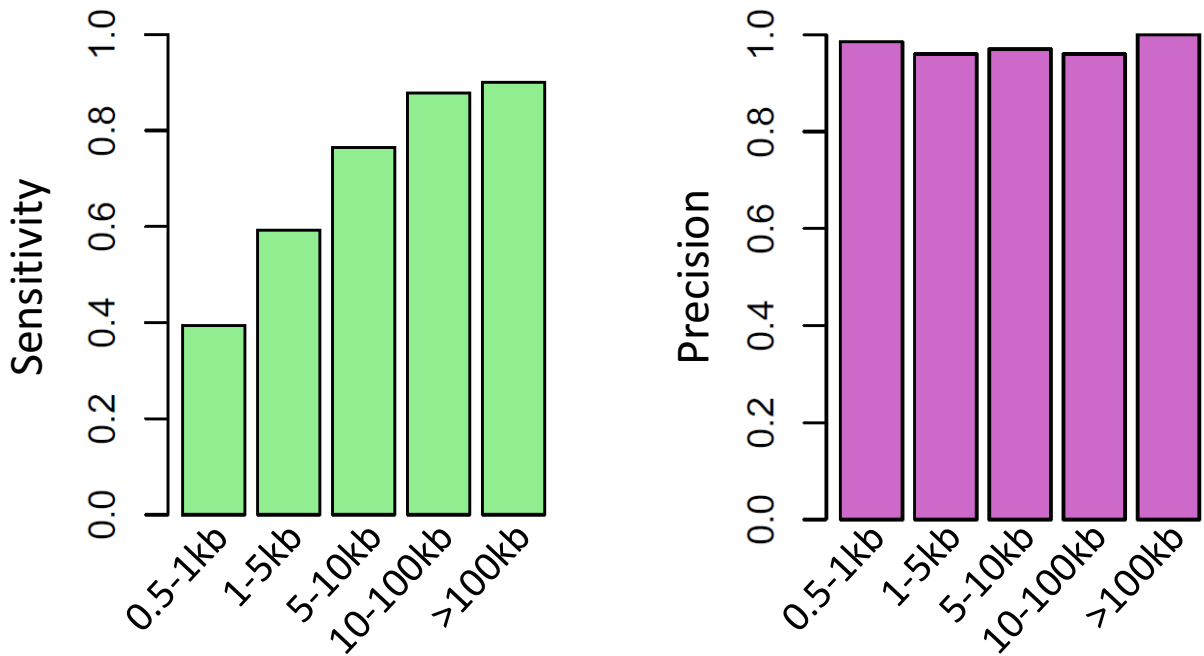

**Supplementary Note Figure 3:** Performance of Mash distance for identifying links between clusters. Evaluation of the (A) sensitivity and (B) precision of the Mash distance based approach in OPERA-MS to rescue links between clusters, as a function of cluster size (minimum size among the two clusters for a link). The evaluation was done on the GIS20 nanopore dataset and true links were identified by mapping of contigs to the reference genomes using MUMmer.

## References

1. Chin, C.-S. *et al.* Nonhybrid, finished microbial genome assemblies from long-read SMRT sequencing data. *Nat. Methods* **10**, 563–569 (2013).
2. Loman, N. J., Quick, J. & Simpson, J. T. A complete bacterial genome assembled de novo using only nanopore sequencing data. *Nat. Methods* **12**, 733–735 (2015).
3. Brown, C. T., Olm, M. R., Thomas, B. C. & Banfield, J. F. Measurement of bacterial replication rates in microbial communities. *Nat. Biotechnol.* **34**, 1256–1263 (2016).
4. Ondov, B. D. *et al.* Mash: fast genome and metagenome distance estimation using MinHash. *Genome Biol.* **17**, 132 (2016).
